# Supplementary material
Source: publisher figshare collection journal article supplement (https://acs.figshare.com/ndownloader/files/11449625)
Supplement: Supplementary file 1 [file 11449625]

**Supporting Information**  
**Fabrication of Polythiophene Supported Ag@Fe<sub>3</sub>O<sub>4</sub> Nanoclusters and their Utilization as Photocatalyst in Dehydrogenative Coupling Reactions**

Radhika Chopra, Manoj Kumar and Vandana Bhalla\*

*Department of Chemistry, UGC-Centre for Advanced Studies-II, Guru Nanak Dev University,  
Amritsar-143005, Punjab (India)*

Email: [vanmanan@yahoo.co.in](mailto:vanmanan@yahoo.co.in)

---

Contents (Page: PS1-S49; Table: Table S1-S7; Figure: Figure S1-S50; Scheme: Scheme S1-S4)

**Page No.      Contents**

**S5-S9**    General Experimental methods

**S10**    Comparison of wet chemical method in present manuscript over other reported procedure in the Literature for the preparation of Ag@Fe<sub>3</sub>O<sub>4</sub> nanocomposites

**S11**    Scheme showing comparison of generation of Ag@Fe<sub>3</sub>O<sub>4</sub> nanocomposites with previously reported methods.

**S12**    Comparison of catalytic activity of polythiophene supported Ag@Fe<sub>3</sub>O<sub>4</sub> nanoclusters (NCs) with other catalytic systems reported in literature for C-H functionalization/C-N bond formation.

**S13**    UV-Vis spectrum of compound **3** in pure THF and absorption spectra showing the variation of absorbance of compound **3** (10 µM) in H<sub>2</sub>O-THF mixture with different fractions of H<sub>2</sub>O.

**S14**    Absorption spectra of compound **3** in H<sub>2</sub>O-THF (1:1) solvent mixture upon increasing temperature from 25°C to 70°C and fluorescence spectra of compound **3** (10 µM) in H<sub>2</sub>O-THF mixture with different water fractions.

**S15**    TEM image of compound **3** in H<sub>2</sub>O-THF (1:1) mixture showing irregular shaped assemblies and DLS studies of compound **3** in H<sub>2</sub>O-THF (1:1) mixture.

**S16**    UV-vis spectra of compound **3** (10 µM) upon addition of Ag<sup>+</sup> ions (100 equiv.) with time in H<sub>2</sub>O-

THF (1:1) solvent mixture showing surface plasmon resonance (SPR) band at 438 nm and graphical representation of the rate of formation of silver nanoparticles (AgNPs) stabilized by assemblies of compound **3**.

- S17** UV-vis spectra of compound **3** (10  $\mu$ M) upon addition of  $\text{Fe}^{3+}$  ions (20 equiv.) in  $\text{H}_2\text{O}$ -THF (1:1) solvent mixture.
- S18** Absorption spectra of compound **3** (10  $\mu$ M) upon addition of various metal ions ( $\text{Ag}^+$ ,  $\text{Fe}^{3+}$ ,  $\text{Hg}^{2+}$ ,  $\text{Co}^{2+}$ ,  $\text{Fe}^{2+}$ ,  $\text{Li}^+$ ,  $\text{Mg}^{2+}$ ,  $\text{Cu}^{2+}$ ,  $\text{Cd}^{2+}$ ,  $\text{Ni}^{2+}$ ,  $\text{Pb}^{2+}$ ,  $\text{Na}^+$ ,  $\text{K}^+$ ,  $\text{Zn}^{2+}$ ,  $\text{Al}^{3+}$ ,  $\text{Ca}^{2+}$  and  $\text{Pd}^{2+}$ ) as their perchlorate/nitrate/chloride salt in  $\text{H}_2\text{O}$ -THF (1:1) solvent mixture.
- S19** TEM image showing the (A) formation of  $\text{Ag}:\text{Fe}_3\text{O}_4$  NPs prepared by mixing AgNPs and  $\text{Fe}^{3+}$  ions in 1:1 ratio; (B) formation of  $\text{Ag}@\text{Fe}_3\text{O}_4$  NCs by mixing AgNPs and  $\text{Fe}^{3+}$  ions in 1:2 ratio and UV-vis spectra of aqueous solution of (a)  $\text{Fe}_3\text{O}_4$  NCs (b) AgNPs (c)  $\text{Ag}@\text{Fe}_3\text{O}_4$  NCs stabilized by assemblies of compound **3**.
- S20** Schematic illustration of generation of polythiophene **4** supported  $\text{Ag}@\text{Fe}_3\text{O}_4$  NCs (supported by TEM image) by adding aqueous solution of  $\text{Fe}^{3+}$  ions and AgNPs to the assemblies of compound **3** under stirring and UV-vis spectra with time for simultaneous addition of aqueous solution of  $\text{Fe}^{3+}$  ions and AgNPs to the assemblies of compound **3** (10  $\mu$ M).
- S21** Graphical representation of rate of formation of  $\text{Ag}@\text{Fe}_3\text{O}_4$  NCs and fluorescence spectra of compound **3** (10  $\mu$ M) with addition of AgNPs and  $\text{Fe}^{3+}$  ions in  $\text{H}_2\text{O}$ -THF (1:1) solvent mixture
- S22** Cyclic voltammogram of the compound **3** & polythiophene **4** supported  $\text{Ag}@\text{Fe}_3\text{O}_4$  NCs in  $\text{H}_2\text{O}:\text{CH}_3\text{CN}$  (1:1) solvent mixture and table showing oxidation and reduction potential of compound **3** and polythiophene **4** supported  $\text{Ag}@\text{Fe}_3\text{O}_4$  NCs.
- S23** TEM image, SAED pattern and DLS studies of polythiophene **4** supported  $\text{Ag}@\text{Fe}_3\text{O}_4$  NCs.

- S24** X-Ray diffraction pattern and Raman scattering spectrum of polythiophene **4** supported Ag@Fe<sub>3</sub>O<sub>4</sub> NCs.
- S25** XPS analysis of polythiophene **4** supported Ag@Fe<sub>3</sub>O<sub>4</sub> NCs and thermogravimetric analysis (TGA) of compound **3** & polythiophene **4** supported Ag@Fe<sub>3</sub>O<sub>4</sub> NCs.
- S26** Hysteresis loop of polythiophene nanosheets supported Ag@Fe<sub>3</sub>O<sub>4</sub> nanocomposites at room temperature (25°C) and table showing the coercivity, magnetization values obtained from hysteresis loop of polythiophene nanosheets supported Ag@Fe<sub>3</sub>O<sub>4</sub> nanocomposites at room temperature.
- S27** FT-IR Spectrum of compound **3** & polythiophene **4** supported Ag@Fe<sub>3</sub>O<sub>4</sub> NCs and ESI-MS spectrum of trimer of oxidized species **4**.
- S28** Schematic illustration for preparation of AgNPs in presence of assemblies of compound **3** and schematic presentation describing the preparation of polythiophene **4** supported Ag@Fe<sub>3</sub>O<sub>4</sub> NCs.
- S29** TEM image showing the formation of Ag@Fe<sub>3</sub>O<sub>4</sub> NPs prepared by mixing AgNPs & Fe<sup>3+</sup> ions in 2:1 ratio in presence of assemblies of compound **3**, fluorescence spectra of oxidized species **4** in H<sub>2</sub>O-THF (1:1) solvent mixture upon addition of bare Ag@Fe<sub>3</sub>O<sub>4</sub> nanocomposites and spectral overlap of absorption spectrum of Ag@Fe<sub>3</sub>O<sub>4</sub> NCs & fluorescence spectrum of oxidized species **4** in H<sub>2</sub>O-THF (1:1) mixture showing energy transfer from oxidized species **4** to Ag@Fe<sub>3</sub>O<sub>4</sub> NCs.
- S30** UV-vis spectra of aqueous solution of (a) bimetallic Ag:Fe<sub>3</sub>O<sub>4</sub> NPs (b) AgNPs (c) Fe<sub>3</sub>O<sub>4</sub> NCs stabilized by assemblies of compound **5**, TEM image of Ag:Fe<sub>3</sub>O<sub>4</sub> NPs stabilized by assemblies of compound **5** and table showing optimization of reaction conditions for dehydrogenative coupling of **6a** utilizing polythiophene **4** supported Ag@Fe<sub>3</sub>O<sub>4</sub> NC as photocatalyst.
- S31** Table showing Influence of the stabilizing agent on the photocatalytic efficiency of Ag@Fe<sub>3</sub>O<sub>4</sub> nanocomposites in dehydrogenative coupling of phenylhydrazones and structure of polythiophene

**S32** Polythiophene supported Ag@Fe<sub>3</sub>O<sub>4</sub> NCs (a) separated aqueous layer after completion of model reaction; (b) a magnetic stirring bar put towards the aqueous layer; (c) an external magnet attracted Ag@Fe<sub>3</sub>O<sub>4</sub> NCs and recyclability of polythiophene **4** supported Ag@Fe<sub>3</sub>O<sub>4</sub> NCs as photocatalyst for synthesis of indazole compounds.

**S33** Table showing effect of addition of TEMPO on dehydrogenative coupling of benzophenone phenylhydrazone, **6a** in presence of polythiophene **4** supported Ag@Fe<sub>3</sub>O<sub>4</sub> NCs as photocatalyst and mass spectrum of **6a-TEMPO** adduct.

**S34** Plausible mechanism for dehydrogenative coupling of **6a** utilizing polythiophene **4** supported Ag@Fe<sub>3</sub>O<sub>4</sub> NCs as photocatalyst.

**S35-44** NMR spectra of compounds **7a-7j**

**S45** NMR spectrum of compound **3**

**S46** Mass spectrum of compound **3**

**S47** NMR spectrum of compound **5**

**S48** Mass spectrum of compound **5**

## General experimental methods<sup>1</sup>

“UV-vis spectra were recorded on a SHIMADZU UV-2450 spectrophotometer using a quartz cuvette (path length, 1 cm). The fluorescence spectra were obtained with a SHIMADZU 5301 PC spectrofluorimeter. TEM images were recorded in Transmission Electron Microscope (TEM-JEOL 2100F). X-ray diffraction patterns were collected using Rigaku Xpert Pro-X-ray diffractometer provided with CuK $\alpha$  radiation (1.541 Å) in the 2 $\theta$  range of 20-80° at a step size of 0.02°. The dynamic light scattering (DLS) data were recorded with MALVERN Instruments (Nano-ZS). Infrared spectra were obtained on Varian 660-IR spectrometer using KBr pellets.” X-ray photoelectron spectra (XPS) were acquired in PHI Versa Prob 5000. The amount of Ag and Fe in catalyst was determined by atomic absorption spectrophotometer (GBC Avant Ver 1.31). Sample preparation was done by reflux assisted digestion of 2 mg of catalyst with concentrated HNO<sub>3</sub>. The resulting solution was cooled, centrifuged and filtered. The filtrate was diluted to 10 times with deionized water. The surface area studies were carried out on a Brunauer-Emmett-Teller (BET) surface area analyzer. The samples were degassed at 120°C for 6h in vacuum before taking the measurements. Cyclic Voltammetry studies were performed on CH Instruments CH1660D in presence of supporting electrolyte 0.1M tetrabutylammonium perchlorate (Bu<sub>4</sub>NClO<sub>4</sub>), Ag/AgCl as reference electrode, platinum wire as counter electrode and glass carbon electrode as working electrode. “TEM and HR-TEM images were recorded using HR-TEM-JEM 2100 microscope.” Raman spectrum was obtained through Renishaw in *via* reflex micro Raman microscope. “To record FT-IR spectra, VARIAN 660 IR Spectrometer was used.” Thermogravimetric analysis (TGA) was carried out on EXSTAR TG/DTA 3600 at a heating rate of 100°C/min under nitrogen atmosphere. VSM measurements were obtained on PAR vibrating sample magnetometer. “Photocatalytic experiments were carried out by using the 100 W tungsten filament bulbs as irradiation source.” Elemental analysis (C, H, and S) was performed on a Flash EA 1112

CHNS analyzer (Thermo Electron Corp.).  $^1\text{H}$  NMR was recorded on a JEOL-FT NMR-AL 400 MHz and Bruker (Avance II) FT-NMR 500 MHz spectrophotometer using  $\text{CDCl}_3$  as solvent and tetramethylsilane ( $\text{Si}(\text{CH}_3)_4$ ) for internal standards. Further, NMR data was expressed as follows: chemical shifts in ppm ( $\delta$ ) and coupling constants in Hz ( $J$ ). Multiplicities of signals were quoted as follows: s = singlet, d = doublet, dd = doublet of doublet, t = triplet, dt = doublet of triplet and m = multiplet.

### Quantum Yield Calculations:

To find out the fluorescence quantum yield of compound **3**, solution of diphenylanthracene ( $\Phi_{\text{fr}} = 0.90$  in cyclohexane) was used as reference at an excitation wavelength ( $\lambda_{\text{ex}}$ ) of 322 nm. Further, the following equation was used to determine the quantum yield:

$$\Phi_{\text{fs}} = \Phi_{\text{fr}} \times \frac{1-10^{-A_{\text{rLr}}}}{1-10^{-A_{\text{sLr}}}} \times \frac{N_{\text{s}}^2}{N_{\text{r}}^2} \times \frac{D_{\text{s}}}{D_{\text{r}}}$$

$\Phi_{\text{fs}}$  and  $\Phi_{\text{fr}}$  signify the fluorescence quantum yields of sample and reference, respectively.  $L_{\text{s}}$ ,  $A_{\text{s}}$ ,  $D_{\text{s}}$  and  $N_{\text{s}}$  are the length of the absorption cells, absorbance, respective areas of emission and refractive index of sample, respectively.  $L_{\text{r}}$ ,  $A_{\text{r}}$ ,  $D_{\text{r}}$  and  $N_{\text{r}}$  are the length of the absorption cells, absorbance, respective areas of emission and refractive index of reference, respectively.

## EXPERIMENTAL SECTION

### Synthetic scheme of compound **3**:

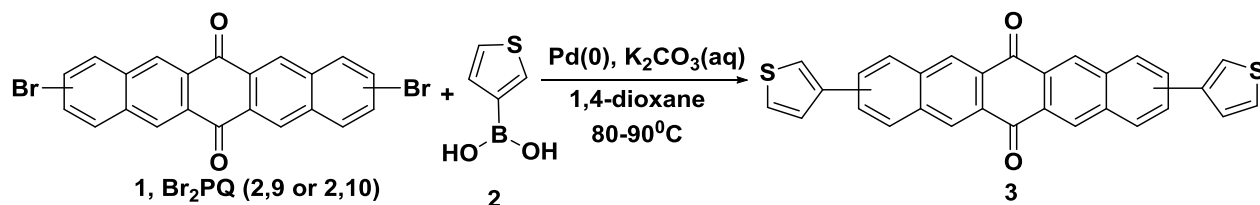

**Scheme S1** Synthesis of pentacenequinone compound **3**

To a mixture of compounds **1** (0.30 g, 0.64 mmol) and **2** (0.17 g, 1.35 mmol) in 20 mL of 1, 4-dioxane was added 1 mL of aqueous solution of  $\text{K}_2\text{CO}_3$  (0.71 g, 5.15 mmol) followed by addition of  $[\text{Pd}(\text{PPh}_3)_4]$  (0.16 g, 0.14 mmol) under  $\text{N}_2$  atmosphere (Scheme S1). The reaction mixture was refluxed

for 24 h. After completion of the reaction, the excess solvent was removed under reduced pressure and the residue so obtained was dissolved in DCM. The organic layer was washed with water, dried over anhydrous Na<sub>2</sub>SO<sub>4</sub>, and removed under reduced pressure to give a crude product which was purified by column chromatography using chloroform/hexane (7:3) as an eluent to afford compound **3** as yellow solid (0.18 g in 60% yield); mp: >280°C. <sup>1</sup>H NMR (500 MHz, CDCl<sub>3</sub>) δ = 8.98 (s, 2H), 8.95 (s, 2H), 8.32 (s, 2H), 8.17 (d, *J* = 8.5 Hz, 2H), 7.99 (d, *J* = 8.5 Hz, 2H), 7.74-7.71 (m, 2H), 7.61-7.58 (m, 2H), 7.53-7.50 (m, 2H) ppm; *m/z* = 473.2387 [M + H]<sup>+</sup>; Elemental analysis: Calcd. For C<sub>30</sub>H<sub>16</sub>O<sub>2</sub>S<sub>2</sub>: C 76.25; H 3.41; S 13.57. Found: C 76.23; H 3.40; S 13.54. IR (KBr): ν<sub>max</sub> (in cm<sup>-1</sup>) = 3092 (C-H<sub>a</sub> stretching), 1685(s), 1612(s), 1577(s) and 890 (C-H<sub>a</sub> out of plane bending). The <sup>13</sup>C NMR spectrum of compound **3** could not be recorded due to its poor solubility.

#### Synthetic scheme of compound **5**:

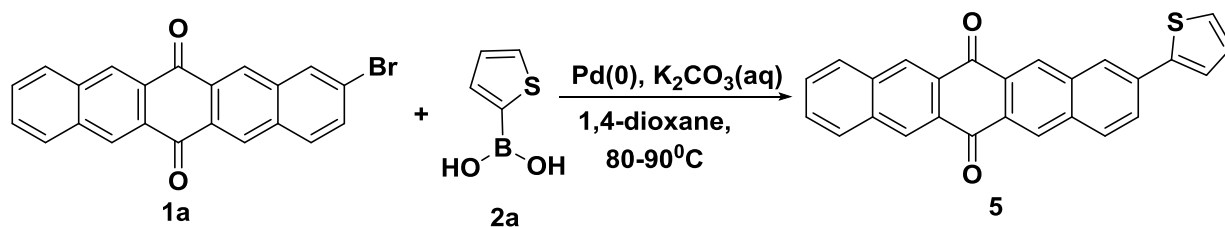

**Scheme S2** Synthesis of pentacenequinone compound **5**

To a mixture of compounds **1a** (0.30 g, 0.78 mmol) and **2a** (0.11 g, 0.85 mmol) in 20 mL of 1,4-dioxane was added 1 mL of aqueous solution of K<sub>2</sub>CO<sub>3</sub> (0.86 g, 6.2 mmol) followed by addition of [Pd(PPh)<sub>3</sub>]<sub>4</sub> (0.27 g, 0.23 mmol) under nitrogen atmosphere (Scheme S2). The reaction mixture was refluxed for 24 h under N<sub>2</sub> atmosphere. After completion of the reaction, the excess solvent was removed under reduced pressure. The residue so obtained was dissolved in DCM. The organic layer was washed with water, dried over anhydrous Na<sub>2</sub>SO<sub>4</sub>, and removed under reduced pressure to give a crude product which was purified by column chromatography using chloroform/hexane (4:6) as an eluent to afford compound **5** as yellow solid (0.19 g in 63% yield); mp: >280°C. <sup>1</sup>H NMR (500 MHz,

$\text{CDCl}_3$ )  $\delta$  = 8.96 (s, 2H), 8.95 (s, 1H), 8.93 (s, 1H), 8.32 (s, 1H), 8.15-8.13 (m, 3H), 7.99-7.97 (m, 1H), 7.73-7.71 (m, 2H), 7.57-7.56 (m, 1H), 7.44-7.43 (m, 1H), 7.20-7.18 (m, 1H) ppm;  $m/z$  = 413.2716  $[\text{M} + \text{Na}]^+$ ; Elemental analysis: Calcd. For  $\text{C}_{26}\text{H}_{14}\text{O}_2\text{S}$ : C 79.98; H 3.61; S 8.21. Found: C 79.96; H 3.59; S 8.19. The  $^{13}\text{C}$  NMR spectrum of compound **5** could not be recorded due to its poor solubility.

### **Synthesis of silver nanoparticles (AgNPs):**

The AgNPs were prepared by reducing the  $\text{AgNO}_3$  utilizing assemblies of compound **3**. Assemblies of compound **3** were prepared by dissolving compound **3** (10  $\mu\text{M}$ ) in  $\text{H}_2\text{O}$ -THF (1:1) solvent mixture. To generate AgNPs, 0.1 M  $\text{AgNO}_3$  (300  $\mu\text{L}$ ) solution was added to 3 mL of assemblies of compound **3** ( $1 \times 10^{-4}$  M). The resulting reaction mixture was stirred at room temperature to obtain greyish AgNPs. These AgNPs were washed with THF and water in order to remove unreacted  $\text{AgNO}_3$  and were utilized as such in the fabrication of polythiophene **4** supported  $\text{Ag@Fe}_3\text{O}_4$  NCs. The concentration of AgNPs solution was found to be 0.009 M as determined by AAS.

### **Generation of polythiophene 4 supported $\text{Ag@Fe}_3\text{O}_4$ NCs:**

#### **(a) Polythiophene 4 supported $\text{Ag-Fe}_3\text{O}_4$ nanocomposites (1:1)**

0.3 mL of AgNPs (0.009 M, dispersed in water) and 0.06 mL of  $\text{FeCl}_3$  (0.1 M) solution were simultaneously added to 6 mL of assemblies of compound **3** ( $10^{-4}$  M) in  $\text{H}_2\text{O}$ -THF (1:1) solvent mixture with vigorous stirring. During stirring, color of solution was changed from light brown to blackish brown indicating the generation of polythiophene **4** supported  $\text{Ag-Fe}_3\text{O}_4$  nanocomposites. Black colored precipitates were observed after stirring the reaction mixture continuously for 1h at room temperature. The resulting reaction mixture was sonicated to obtain homogeneous solution.

#### **(b) Polythiophene 4 supported $\text{Ag@Fe}_3\text{O}_4$ NCs (1:2)**

For preparation of polythiophene **4** supported  $\text{Ag@Fe}_3\text{O}_4$  NCs (1:2), 0.3 mL of AgNPs solution (0.009 M), 120  $\mu\text{L}$  of  $\text{FeCl}_3$  solution (0.1 M) and 9.0 mL of assemblies of compound **3** ( $10^{-4}$  M) in  $\text{H}_2\text{O}$ -THF



(1:1) solution were mixed and stirred vigorously at room temperature for 1h. 5.0 mL of this solution was used as such for carrying out dehydrogenative coupling reactions.

**(c) Polythiophene 4 supported Ag@Fe<sub>3</sub>O<sub>4</sub> NPs (2:1)**

For preparation of polythiophene 4 supported Ag@Fe<sub>3</sub>O<sub>4</sub> NPs (1:2), 0.6 mL of AgNPs solution (0.009 M), 60  $\mu$ L of FeCl<sub>3</sub> solution (0.1 M) and 9.0 mL of assemblies of compound 3 (10<sup>-4</sup> M) in H<sub>2</sub>O-THF (1:1) solution were mixed. The resulting solution was vigorously stirred for 1h at room temperature.

**General experimental procedure for dehydrogenative coupling reactions utilizing polythiophene 4 supported Ag@Fe<sub>3</sub>O<sub>4</sub> NCs (1:2) as photocatalyst:**

In a 50 ml round-bottom flask (RBF), benzophenone phenylhydrazone, **6a** (1.0 equiv., 0.1 g) was dissolved in 10 mL of toluene-H<sub>2</sub>O (1:1) solvent mixture in presence of *in situ* generated polythiophene 4 supported Ag@Fe<sub>3</sub>O<sub>4</sub> nanoclusters (0.01 mmol). After degassing the reaction mixture under vacuum for 2-3 min, the RBF was put in a water bath (to prevent heating effect) on magnetic stirrer. The reaction mixture was irradiated with a 100 W tungsten filament bulb (0.4 W/cm<sup>2</sup>) to provide visible light for 8 h. After completion of the reaction, solvent was evaporated under reduced pressure and the resulting residue was dissolved in DCM. The organic layer was washed with water, dried over anhydrous Na<sub>2</sub>SO<sub>4</sub> and concentrated under reduced pressure to yield the crude product which was recrystallized from ethanol and hexane to obtain pure product, **7a**. The aqueous layer containing photocatalyst was retrieved magnetically and was reused for carrying out further dehydrogenative coupling reactions.

For preparation of indazole derivatives, reactants (**6a-6j**) were synthesized according to previously reported methods<sup>2</sup>.

**Table S1. Comparison of wet chemical method in present manuscript over other reported procedure in the literature for the preparation of Ag@Fe<sub>3</sub>O<sub>4</sub> nanocomposites.**

| Journal                                                   | Nanoparticles                                                                       | Preparation method         | Chemicals used                                                                                                                                             | External Reducing /oxidising agent/Surfactant/Base | Temp (°C)               | Time       | Application                                                         | Shape                                                | Size             | Re-cyclability of catalyst |
|-----------------------------------------------------------|-------------------------------------------------------------------------------------|----------------------------|------------------------------------------------------------------------------------------------------------------------------------------------------------|----------------------------------------------------|-------------------------|------------|---------------------------------------------------------------------|------------------------------------------------------|------------------|----------------------------|
| <b>Present work</b>                                       | <b>Polythiophene supported Ag@Fe<sub>3</sub>O<sub>4</sub> magnetic nanoclusters</b> | <b>Wet Chemical method</b> | <b>Pentacenequinone compound 3, AgNO<sub>3</sub>, FeCl<sub>3</sub>·6H<sub>2</sub>O</b>                                                                     | <b>No</b>                                          | <b>Room temperature</b> | <b>4 h</b> | <b>C-N bond formation via Dehydrogenative coupling</b>              | <b>Spherical shaped</b>                              | <b>34 nm</b>     | <b>Yes (8 times)</b>       |
| <i>ACS Appl. Mater. Interfaces</i> <b>2017</b> , 9, 24433 | Ag@Fe <sub>3</sub> O <sub>4</sub> core-shell NPs                                    | Solvo thermal method       | Fe(NO <sub>3</sub> ) <sub>3</sub> ·9H <sub>2</sub> O, AgNO <sub>3</sub> , NaAc, PDDA, ethylene glycol                                                      | Yes                                                | 210 °C                  | 4 h        | -                                                                   | Spherical shaped                                     | 141.4 - 181.2 nm | -                          |
| <i>New J. Chem.</i> , <b>2017</b> , 41, 10155             | Ag@ Fe <sub>3</sub> O <sub>4</sub> -PEI NPs                                         | Solvo thermal method       | Fe(NO <sub>3</sub> ) <sub>3</sub> ·9H <sub>2</sub> O, AgNO <sub>3</sub> , NaAc, PVP                                                                        | Yes                                                | 30-200 °C               | 8h         | Bacterial adsorbent                                                 | Spherical shaped                                     | 175 nm           | Yes (6 times)              |
| <i>ACS Sustainable Chem. Eng.</i> <b>2016</b> , 4, 965    | Ag-Fe <sub>3</sub> O <sub>4</sub> nanoparticles                                     | Coprecipitation route      | FeCl <sub>3</sub> ·6H <sub>2</sub> O, FeSO <sub>4</sub> ·7H <sub>2</sub> O, NaOH, CMC-stabilized Ag NPs                                                    | Yes                                                | 100 °C                  | 1h         | Reduction of aldehydes using 40 bar H <sub>2</sub>                  | Spherical shaped                                     | 17-18 nm         | Yes (6 times)              |
| <i>ACS Appl. Mater. Interfaces</i> <b>2016</b> , 8, 25162 | Ag-Fe <sub>3</sub> O <sub>4</sub> Core- Shell                                       | Solvo thermal method       | Fe(NO <sub>3</sub> ) <sub>3</sub> ·9H <sub>2</sub> O, AgNO <sub>3</sub> , NaOAc                                                                            | Yes                                                | 200 °C                  | 24h        | -                                                                   | Nano flowers                                         | 120/210 nm       | -                          |
| <i>ACS Appl. Mater. Interfaces</i> <b>2015</b> , 7, 16027 | Ag-Fe <sub>3</sub> O <sub>4</sub> Core- Shell                                       | Coprecipitation route      | FeCl <sub>3</sub> ·6H <sub>2</sub> O, FeCl <sub>2</sub> ·4H <sub>2</sub> O, NaOH, PVP, AgNWs                                                               | Yes                                                | 70 °C                   | 1h         | -                                                                   | Fe <sub>3</sub> O <sub>4</sub> nanospheres on AgNWs. | 90-143 nm        | -                          |
| <i>RSC Adv.</i> <b>2015</b> , 5, 102610                   | Ag:Fe <sub>3</sub> O <sub>4</sub> nanocomposite                                     | Solvo thermal method       | Silver oleate, Iron oleate, octadecylene, Oleic acid                                                                                                       | Yes                                                | 150 °C                  | 5h         | Detection of pesticides in water                                    | Spherical                                            | 50 nm            | -                          |
| <i>Scientific Reports</i> <b>2014</b> , 4, 6839           | Ag@Fe <sub>3</sub> O <sub>4</sub> core-shell nanoparticles                          | Thermal decomposition      | Fe(acac) <sub>3</sub> , 1,2-hexadecanediol, oleylamine, oleic acid, AgNO <sub>3</sub>                                                                      | Yes                                                | 200-260 °C              | 2h         | -                                                                   | Brick shaped                                         | 13 nm            | -                          |
| <i>Nanoscale</i> <b>2014</b> , 6, 12618                   | Fe <sub>3</sub> O <sub>4</sub> -Ag nanoparticles                                    | Solvo thermal method       | AgNO <sub>3</sub> , Oleic acid sodium oleate, Polyacrylate stabilized Fe <sub>3</sub> O <sub>4</sub>                                                       | Yes                                                | 200 °C                  | 8h         | Detection of thiram in water                                        | Dumb bell shaped                                     | 500 nm           | -                          |
| <i>Green Chem.</i> <b>2014</b> , 16, 2835                 | Ag-Fe <sub>3</sub> O <sub>4</sub> @chitin nanocomposite                             | Solvo thermal method       | FeCl <sub>2</sub> ·4H <sub>2</sub> O, NaOH, AgNO <sub>3</sub> , Chitin                                                                                     | Yes                                                | 90 °C                   | 10 h       | Reduction of 4-nitrophenol to 4-aminophenol using NaBH <sub>4</sub> | Spherical                                            | 10-40 nm         | Yes (10 times)             |
| <i>J. Phys. Chem. C</i> <b>2014</b> , 118, 13168          | Ag-Fe <sub>3</sub> O <sub>4</sub>                                                   | Thermal decomposition      | Ag seeds, Fe(acac) <sub>3</sub> , oleylamine, oleic acid                                                                                                   | Yes                                                | 300 °C                  | 40 min     | -                                                                   | Nano flowers                                         | 7-8 nm           | -                          |
| <i>J. Mater. Chem. C</i> <b>2014</b> , 2, 9964            | Ag-Fe <sub>3</sub> O <sub>4</sub>                                                   | Coprecipitation route      | FeCl <sub>3</sub> ·6H <sub>2</sub> O, FeCl <sub>2</sub> ·4H <sub>2</sub> O, NH <sub>4</sub> OH, PAA, AgNO <sub>3</sub> , Sodium citrate, NaBH <sub>4</sub> | Yes                                                | RT                      | 2-3 h      | Detection of dopamine                                               | Spherical                                            | 30 nm            | -                          |

### Previous work on preparation of Ag@Fe<sub>3</sub>O<sub>4</sub> nanocomposites<sup>3-5</sup>

- (a)  $\text{Fe}(\text{NO}_3)_3 \cdot 9\text{H}_2\text{O} + \text{AgNO}_3 \xrightarrow[200^\circ\text{C}, 6\text{h}]{\text{NaAc, Ethylene glycol, Citric acid}} \text{Ag@Fe}_3\text{O}_4 \text{ nanocomposites}$   
Size = 141.4-181.2 nm
- (b)  $\text{Fe}(\text{NO}_3)_3 \cdot 9\text{H}_2\text{O} + \text{AgNO}_3 \xrightarrow[200^\circ\text{C}, 24\text{h}]{\text{PVP, NaAc, Ethylene glycol}} \text{Ag@Fe}_3\text{O}_4 \text{ nanocomposites}$   
Size = 175 nm
- (c)  $\text{Fe}(\text{NO}_3)_3 \cdot 9\text{H}_2\text{O} + \text{AgNO}_3 \xrightarrow[210^\circ\text{C}, 24\text{h}]{\text{NaAc, Ethylene glycol}} \text{Ag@Fe}_3\text{O}_4 \text{ nanocomposites}$   
Size = 120/210 nm

- Prolonged reaction time
- High temperature
- Catalytic applications not much explored

### Recent approach

- (d) Assemblies of compound 3 + AgNO<sub>3</sub>  $\xrightarrow{3\text{h}}$  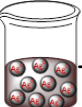  $\xrightarrow[75 \text{ min.}]{\text{Assemblies of compound 3, FeCl}_3 \cdot 6\text{H}_2\text{O}}$    
Solution of AgNPs      Polythiophene supported Ag@Fe<sub>3</sub>O<sub>4</sub> nanoclusters  
Size = 34 nm

- Mixed aqueous media
- Room temperature
- Highly efficient recyclable, photocatalyst in C-H to C-N bond transformation.

**Scheme S3** Scheme showing comparison of generation of Ag@Fe<sub>3</sub>O<sub>4</sub> nanocomposites with previously reported methods.

**Table S2 Comparison of catalytic activity of polythiophene supported Ag@Fe<sub>3</sub>O<sub>4</sub> nanoclusters with other catalytic systems reported in literature for C-H functionalization/C-N bond formation.**

| Journal Name                                           | Catalyst                                                                            | Catalyst loading | Ligand/base/Oxidant                                                      | Solvent                               | Temperature                                | Time         | Yield         |
|--------------------------------------------------------|-------------------------------------------------------------------------------------|------------------|--------------------------------------------------------------------------|---------------------------------------|--------------------------------------------|--------------|---------------|
| <b>Present manuscript</b>                              | <b>Polythiophene supported Ag@Fe<sub>3</sub>O<sub>4</sub> NCs</b>                   | <b>0.01mmol</b>  | <b>-</b>                                                                 | <b>H<sub>2</sub>O:Toluene</b>         | <b>Visible light</b>                       | <b>7-10h</b> | <b>64-90%</b> |
| <i>Angew. Chem. Int Ed.</i><br><b>2017</b> , 56, 1120  | Acr <sup>+</sup> -Mes ClO <sub>4</sub> <sup>-</sup> ,<br>Co(dmgH) <sub>2</sub> PyCl | 3 mol%           | -                                                                        | CH <sub>3</sub> CN                    | Blue LED (3W)<br>Under nitrogen atmosphere | 24h          | 35-89%        |
| <i>J. Am. Chem. Soc.</i><br><b>2017</b> , 139, 643.    | Pd(OAc) <sub>2</sub>                                                                | 0.89 mmol        | Di(2-pyridyl) ketone, H <sub>2</sub> O <sub>2</sub>                      | CH <sub>3</sub> CN, MeOH, THF or AcOH | 60°-80°C                                   | 3-12h        | 82-98%        |
| <i>Angew. Chem. Int. Ed.</i><br><b>2017</b> , 56, 7449 | [RhCp*Cl <sub>2</sub> ] <sub>2</sub>                                                | 5 mol%           | 2-methylquinoline, PhCO <sub>2</sub> Na, Ag <sub>2</sub> CO <sub>3</sub> | Toluene                               | 90°C<br>Under nitrogen atmosphere          | 16h          | 44-88%        |
| <i>Chem. Commun.</i><br><b>2017</b> , 53, 5744         | CuI or Cu(OTf) <sub>2</sub>                                                         | 10 mol%          | PhI(OTFA) <sub>2</sub>                                                   | DCE                                   | 100°C                                      | 10h          | 32-85%        |
| <i>Org. Lett.</i><br><b>2017</b> , 19, 914             | Pd(CH <sub>3</sub> CN) <sub>2</sub> Cl <sub>2</sub>                                 | 10 mol%          | Chloranil                                                                | 1,4-dioxane                           | 80°C                                       | 24 h         | 27-98%        |
| <i>Nat. Commun.</i><br><b>2016</b> , 7, 11188          | Ru(bpy) <sub>3</sub> Cl <sub>2</sub> .6H <sub>2</sub> O                             | 2 mol%           | TEMPO, K <sub>2</sub> CO <sub>3</sub>                                    | CHCl <sub>3</sub>                     | Blue LED (3W)                              | 5-24h        | 51-86%        |
| <i>J. Am. Chem. Soc.</i><br><b>2016</b> , 138, 1265    | Pd/bis-sulfoxide, Co(salophen)                                                      | 2.5-5 mol%       | DHBQ, TBAA, O <sub>2</sub>                                               | TBME                                  | 45°C                                       | 72h          | 52-96%        |
| <i>Org. Lett.</i><br><b>2016</b> , 18, 3586            | Pd(OAc) <sub>2</sub>                                                                | 10 mol%          | O <sub>2</sub>                                                           | DMSO/toluene                          | 80°-120°C                                  | 24 h         | 36-95%        |
| <i>J. Org. Chem.</i><br><b>2016</b> , 81, 2035         | Pd(OAc) <sub>2</sub>                                                                | 20 mol%          | Cu(OAc) <sub>2</sub> , O <sub>2</sub>                                    | DMSO                                  | 120°C                                      | 8-10h        | 63-87%        |
| <i>Chem. Eur. J.</i><br><b>2016</b> , 22, 15669        | Ir(ppy) <sub>2</sub> (dtbbpy)PF <sub>6</sub>                                        | 2 mol%           | NaClO                                                                    | 1,4-dioxane                           | White LED (5 W)                            | 1h           | 45-91%        |
| <i>Chem. Eur. J.</i><br><b>2016</b> , 22, 4379         | Copper(II) 2-ethylhexanoate                                                         | 20 mol%          | Dess-Martin periodinane                                                  | DMSO                                  | 110°C                                      | 1h           | 70-87%        |
| <i>Chem. Eur. J.</i><br><b>2016</b> , 22, 6487         | Cu(OAc) <sub>2</sub>                                                                | 15 mol%          | Ag <sub>2</sub> CO <sub>3</sub>                                          | m-Xylene                              | 140°C                                      | 24h          | 68-91%        |
| <i>ACS Catal.</i><br><b>2015</b> , 5, 4796             | [Ir(dFppy) <sub>2</sub> phen]PF <sub>6</sub> , Pd(OAc) <sub>2</sub>                 | 10 mol%          | Molecular O <sub>2</sub>                                                 | DMSO                                  | 80°C, Blue LED (7W)                        | 8-16h        | 75-94%        |
| <i>Org. Chem. Front.</i><br><b>2015</b> , 2, 51        | Pd(OAc) <sub>2</sub>                                                                | 10 mol%          | Ce(SO <sub>4</sub> ) <sub>2</sub> , DMF, MsOH                            | DCM                                   | 120° C                                     | 48h          | 30-74%        |

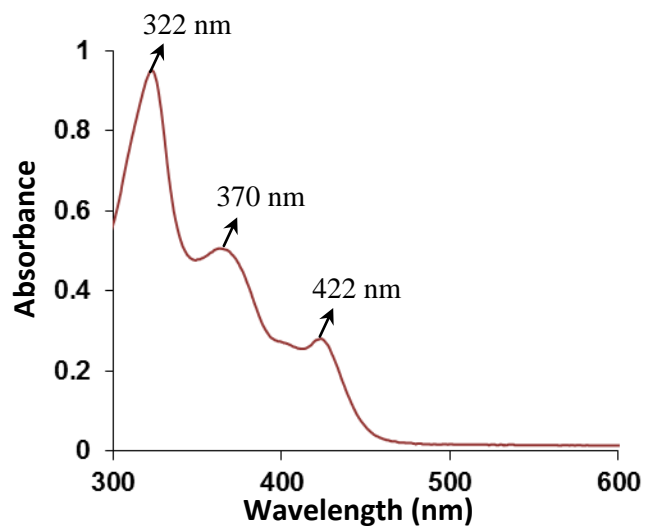

**Figure S1** UV-vis spectrum of compound **3** in pure THF.

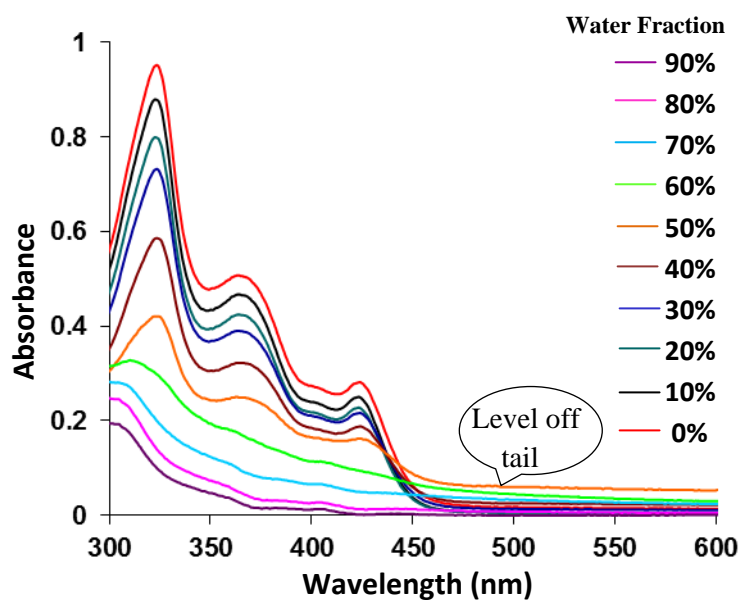

**Figure S2** UV-vis spectra showing the variation of absorbance of compound **3** (10  $\mu$ M) in  $\text{H}_2\text{O}$ -THF mixture with different fractions of  $\text{H}_2\text{O}$ .

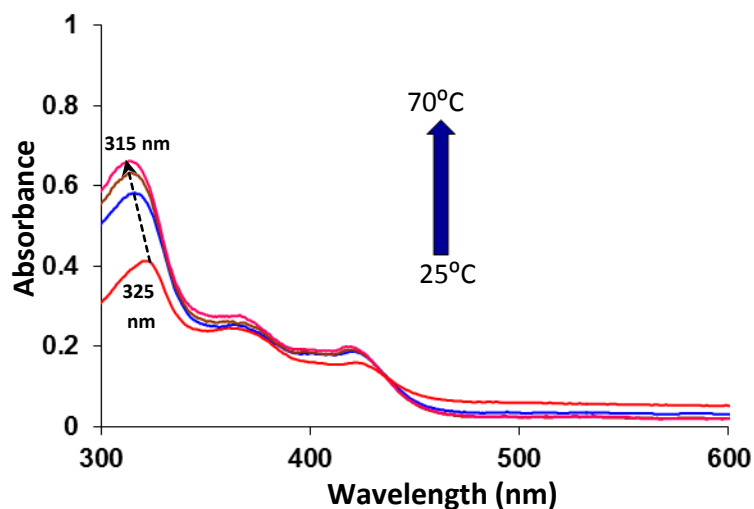

**Figure S3** UV-vis absorption spectra of compound **3** in H<sub>2</sub>O-THF (1:1) solvent mixture upon increasing temperature from 25 to 70°C.

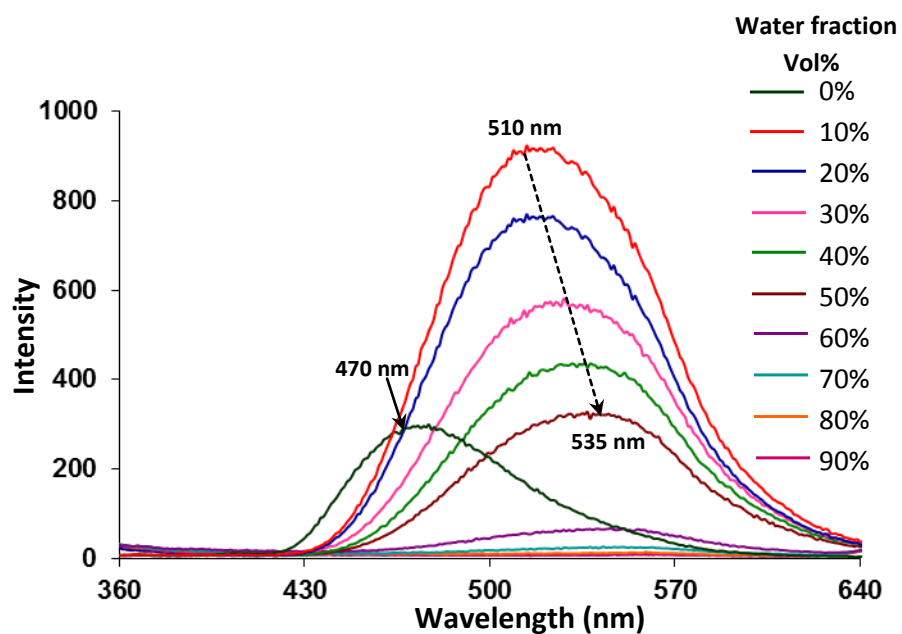

**Figure S4** Fluorescence spectra of compound **3** (10 μM) in H<sub>2</sub>O-THF mixture with different water fractions;  $\lambda_{\text{ex}} = 322$  nm

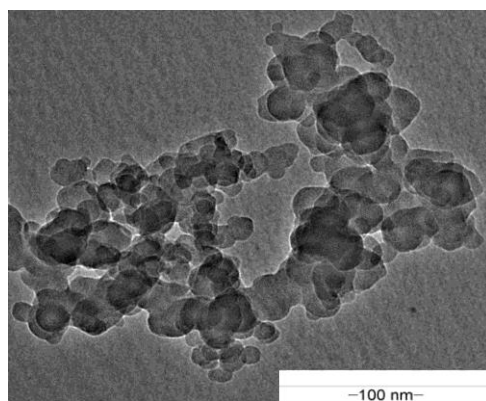

**Figure S5** TEM image of compound **3** in H<sub>2</sub>O-THF (1:1) mixture showing irregular shaped assemblies; scale bar 100 nm.

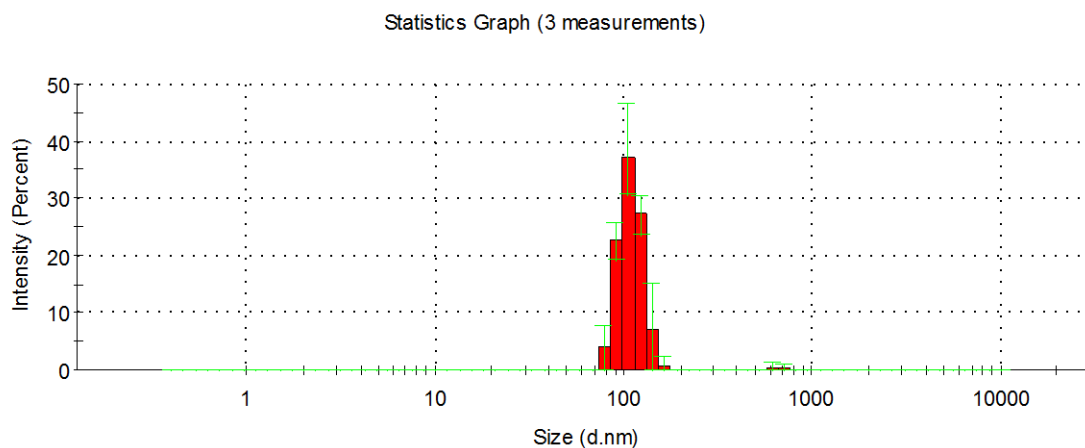

**Figure S6** DLS studies of compound **3** in H<sub>2</sub>O-THF (1:1) mixture which showed the presence of particles having average diameter in the range of 100 nm.

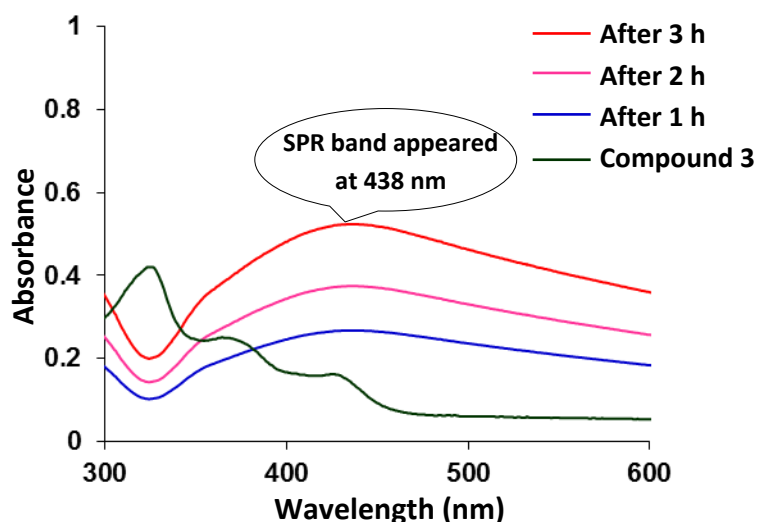

**Figure S7** UV-vis spectra of compound **3** (10  $\mu\text{M}$ ) upon addition of  $\text{Ag}^+$  ions (100 equiv.) with time in  $\text{H}_2\text{O}$ -THF (1:1) solvent mixture showing surface plasmon resonance (SPR) band at 438 nm.

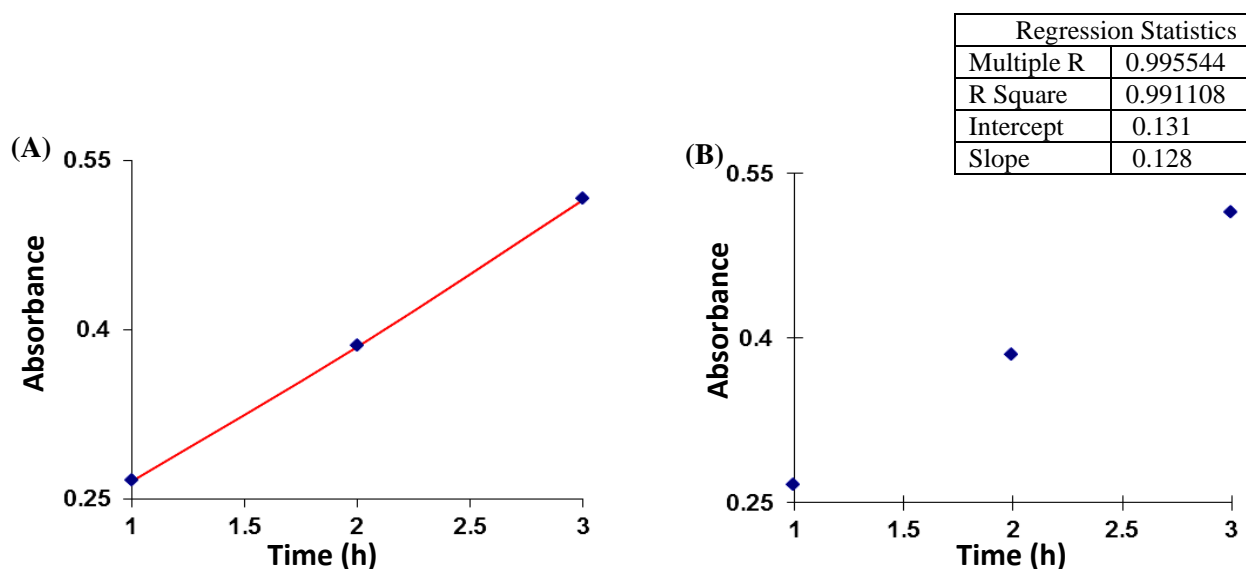

**Figure S8** Graphical representation of the rate of formation of AgNPs stabilized by assemblies of compound **3** (A) Time (h) vs. absorbance plot at 438 nm (B) regression plot of A.

The first order<sup>6</sup> rate constant for the formation of silver nanoparticles was calculated from the changes of intensity of absorbance of assemblies of compound **3** at 438 nm wavelength in the presence of  $\text{Ag}^+$  ions at different time interval.<sup>7-8</sup> From the time vs. absorbance plot at fixed wavelength 438 nm by using first order rate equation, we get the rate constant =  $k = \text{slope} \times 2.303 = 8.18 \times 10^{-5} \text{ sec}^{-1}$ .



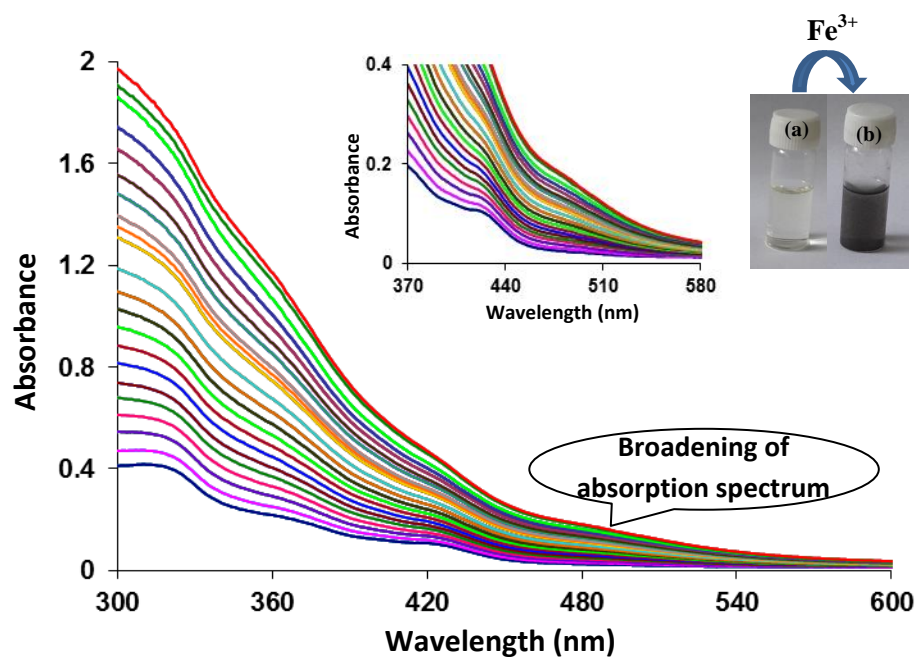

**Figure S9** UV-vis spectra of compound **3** (10 μM) upon addition of Fe<sup>3+</sup> ions (20 equiv.) in H<sub>2</sub>O-THF (1:1) mixture; Inset showing enlarged absorption spectra in the range of 370-580 nm along with change in color of solution from colorless to black in presence of Fe<sup>3+</sup> ions.

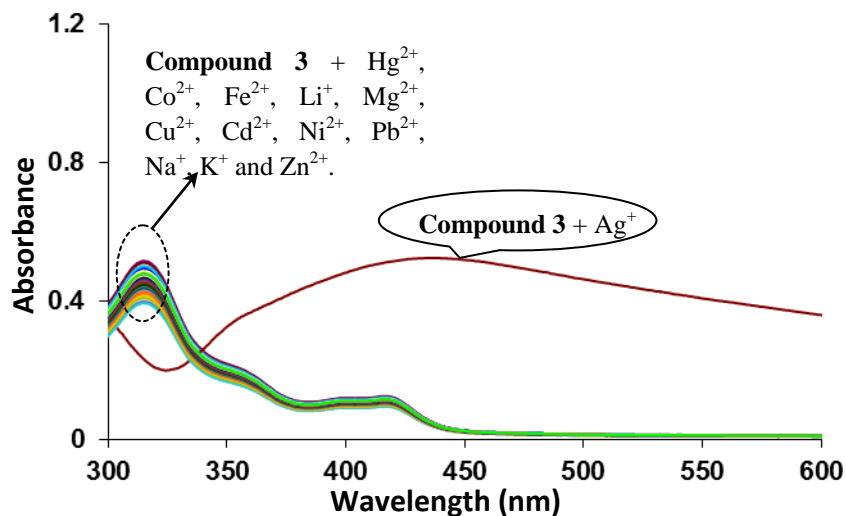

**Figure S10** Absorption spectra of compound **3** (10  $\mu\text{M}$ ) upon additions of 100 equivalents of various metal ions ( $\text{Ag}^+$ ,  $\text{Hg}^{2+}$ ,  $\text{Co}^{2+}$ ,  $\text{Fe}^{2+}$ ,  $\text{Li}^+$ ,  $\text{Mg}^{2+}$ ,  $\text{Cu}^{2+}$ ,  $\text{Cd}^{2+}$ ,  $\text{Ni}^{2+}$ ,  $\text{Pb}^{2+}$ ,  $\text{Na}^+$ ,  $\text{K}^+$  and  $\text{Zn}^{2+}$ ) as their perchlorate/nitrate salt in  $\text{H}_2\text{O}$ -THF (1:1), buffered with HEPES, pH = 7.0.

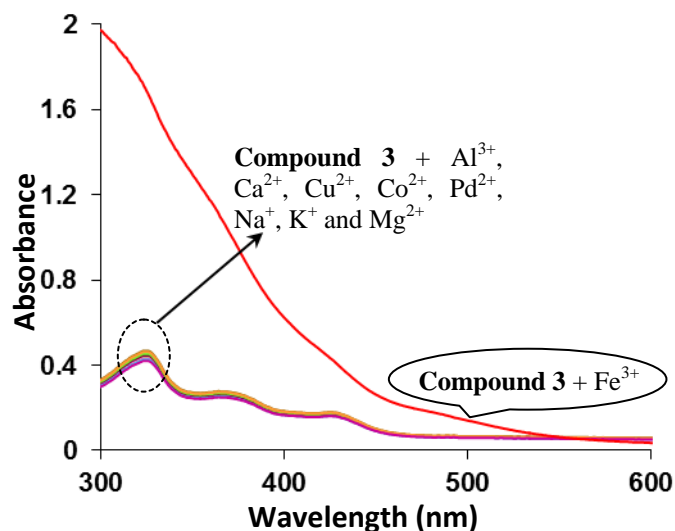

**Figure S11** Absorption spectra of compound **3** (10  $\mu\text{M}$ ) upon additions of 20 equivalents of various metal ions ( $\text{Al}^{3+}$ ,  $\text{Ca}^{2+}$ ,  $\text{Cu}^{2+}$ ,  $\text{Co}^{2+}$ ,  $\text{Fe}^{3+}$ ,  $\text{Pd}^{2+}$ ,  $\text{Na}^+$ ,  $\text{K}^+$  and  $\text{Mg}^{2+}$ ) as their chloride salt in  $\text{H}_2\text{O}$ -THF (1:1), buffered with HEPES, pH = 7.0.

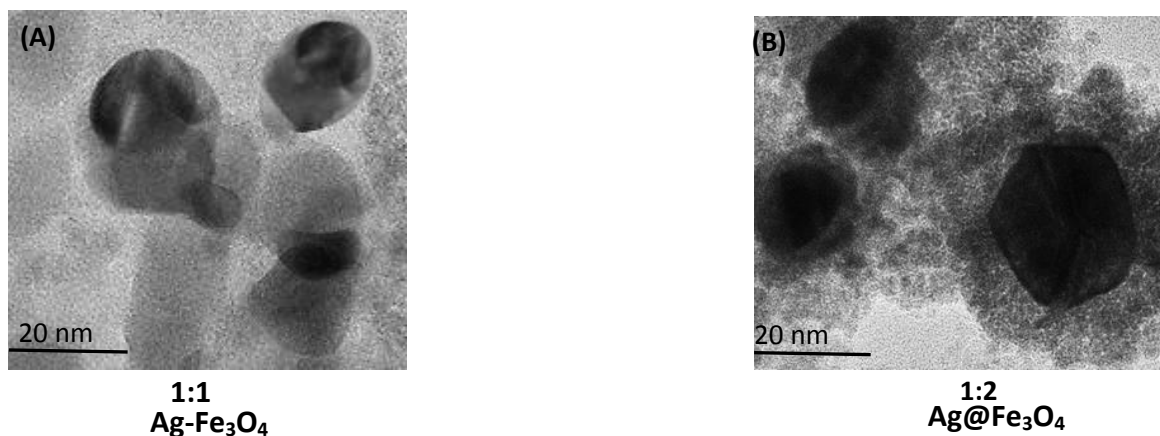

**Figure S12** (A) TEM image showing the (A) formation of Ag-Fe<sub>3</sub>O<sub>4</sub> NPs prepared by mixing AgNPs and Fe<sup>3+</sup> ions in 1:1 ratio; (B) formation of Ag@Fe<sub>3</sub>O<sub>4</sub> NCs by mixing AgNPs and Fe<sup>3+</sup> ions in 1:2 ratio.

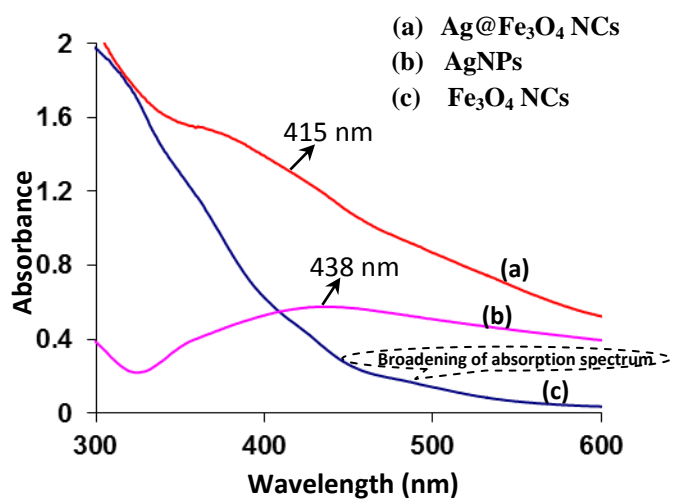

**Figure S13** UV-vis spectra of aqueous solution of (a) Fe<sub>3</sub>O<sub>4</sub> NCs (b) AgNPs (c) Ag@Fe<sub>3</sub>O<sub>4</sub> NCs stabilized by assemblies of compound **3**.

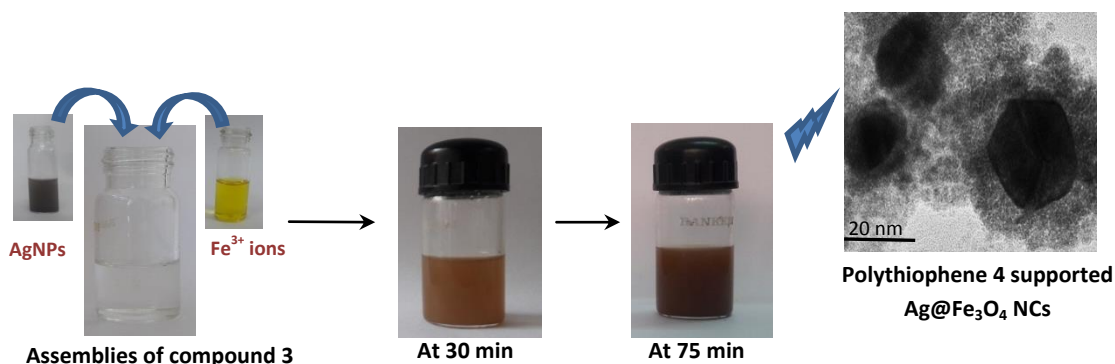

**Figure S14** Schematic illustration of generation of polythiophene **4** supported Ag@Fe<sub>3</sub>O<sub>4</sub> NCs (supported by TEM image) by adding aqueous solution of Fe<sup>3+</sup> ions and AgNPs to the assemblies of compound **3** under stirring.

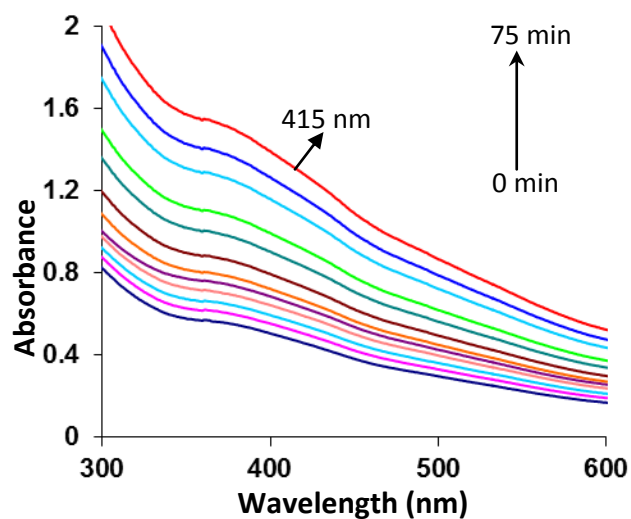

**Figure S15** UV-vis spectra with time for simultaneous addition of aqueous solution of Fe<sup>3+</sup> ions and AgNPs to the assemblies of compound **3** (10  $\mu$ M).

| Regression Statistics |          |
|-----------------------|----------|
| Multiple R            | 0.995065 |
| R Square              | 0.990155 |
| Intercept             | 0.443514 |
| Slope                 | 0.010662 |

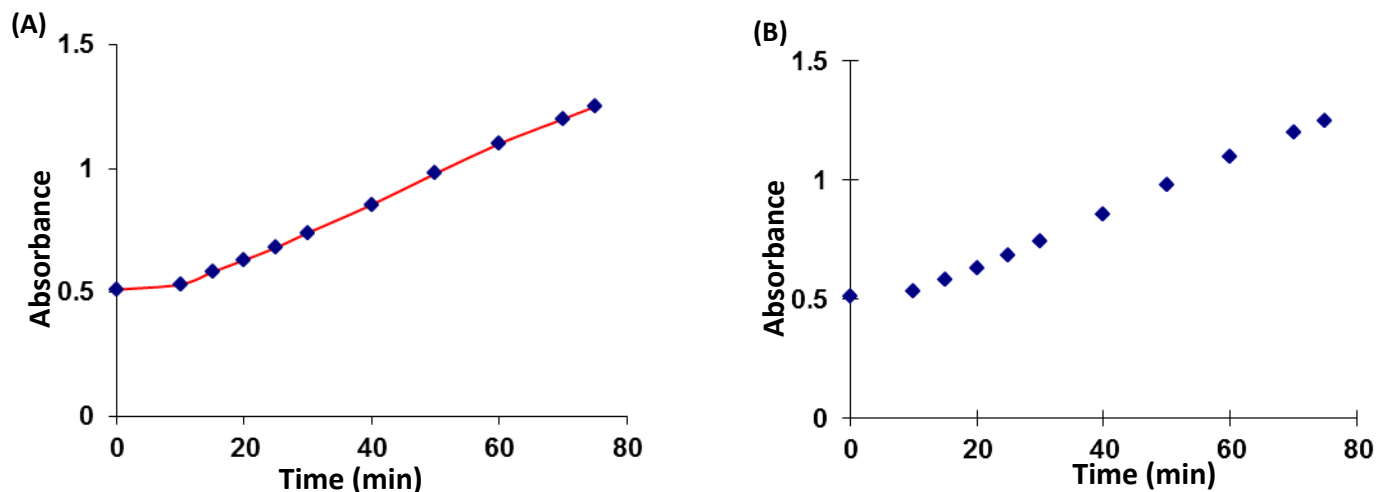

**Figure S16** Graphical representation of rate of formation of Ag@Fe<sub>3</sub>O<sub>4</sub> NCs (A) Time (min.) vs. absorbance plot at 415 nm (B) regression plot of A.

The first order rate constant for the formation of Ag@Fe<sub>3</sub>O<sub>4</sub> NCs was calculated from the change of intensity of blue shifted absorbance band of AgNPs in the presence of assemblies of compound **3** and FeCl<sub>3</sub> solution at different time interval.

From the time vs. absorbance plot at fixed wavelength 415 nm by using first order rate equation, we get the rate constant =  $k = \text{slope} \times 2.303 = 4.09 \times 10^{-4} \text{ s}^{-1}$ .

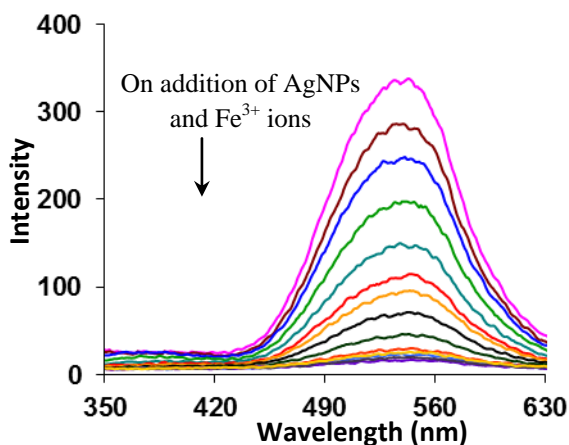

**Figure S17** Fluorescence spectra of compound **3** (10  $\mu\text{M}$ ) with addition of AgNPs and Fe<sup>3+</sup> ions in H<sub>2</sub>O-THF (1:1) solvent mixture;  $\lambda_{\text{ex}} = 322 \text{ nm}$ .

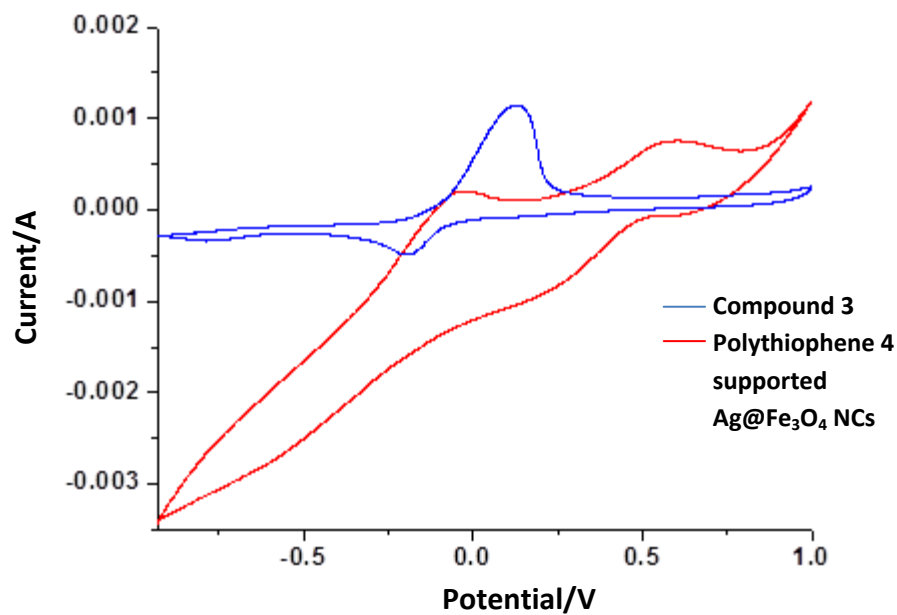

**Figure S18** Cyclic voltammogram of the compound **3** and polythiophene **4** supported Ag@Fe<sub>3</sub>O<sub>4</sub> NCs in H<sub>2</sub>O:CH<sub>3</sub>CN (1:1) containing 0.1 M Bu<sub>4</sub>NClO<sub>4</sub> (supporting electrolyte) and Ag/AgCl (reference electrode).

**Table S3** Table showing oxidation and reduction potential of compound **3** and polythiophene **4** supported Ag@Fe<sub>3</sub>O<sub>4</sub> NCs.

| Entry                                                                  | Reduction potential (eV) | Oxidation potential (eV) |
|------------------------------------------------------------------------|--------------------------|--------------------------|
| Compound <b>3</b>                                                      | -0.19                    | 0.13                     |
| Polythiophene <b>4</b> supported Ag@Fe <sub>3</sub> O <sub>4</sub> NCs | 0.22                     | -0.0787                  |

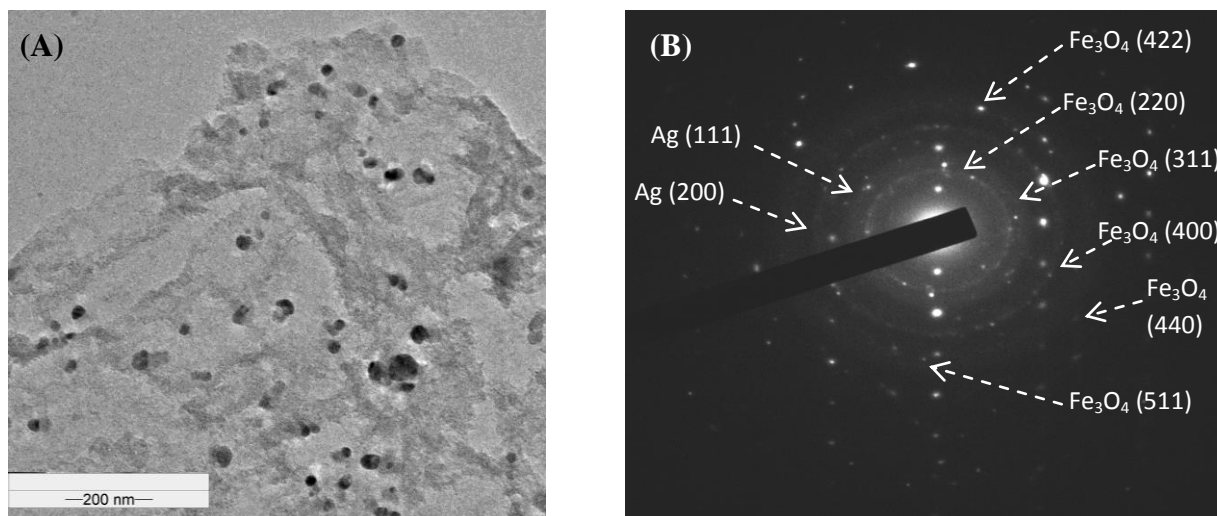

**Figure S19** (A) TEM image of polythiophene **4** supported Ag@Fe<sub>3</sub>O<sub>4</sub> nanoclusters (B) SAED pattern of polythiophene **4** nanosheets supported Ag@Fe<sub>3</sub>O<sub>4</sub> NCs.

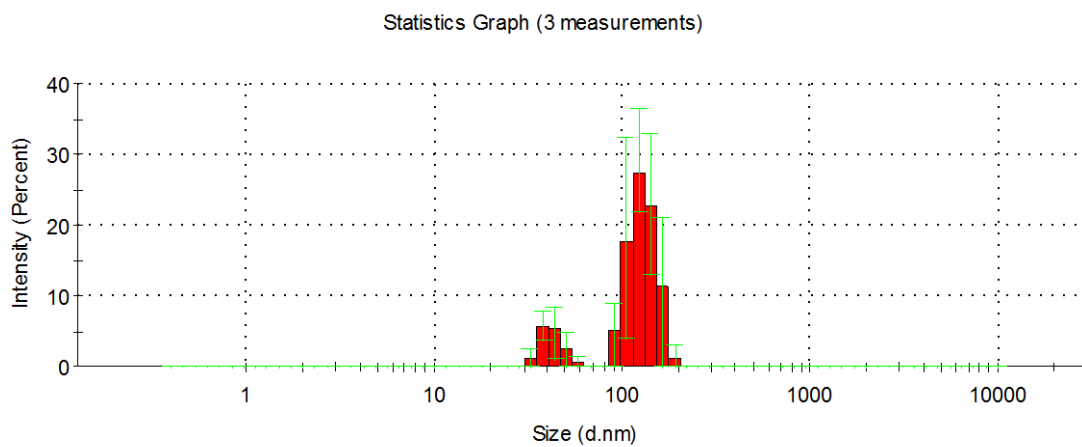

**Figure S20** DLS studies of polythiophene **4** supported Ag@Fe<sub>3</sub>O<sub>4</sub> nanoclusters indicated the presence of two sets of particles having average size 43 nm and 120 nm.

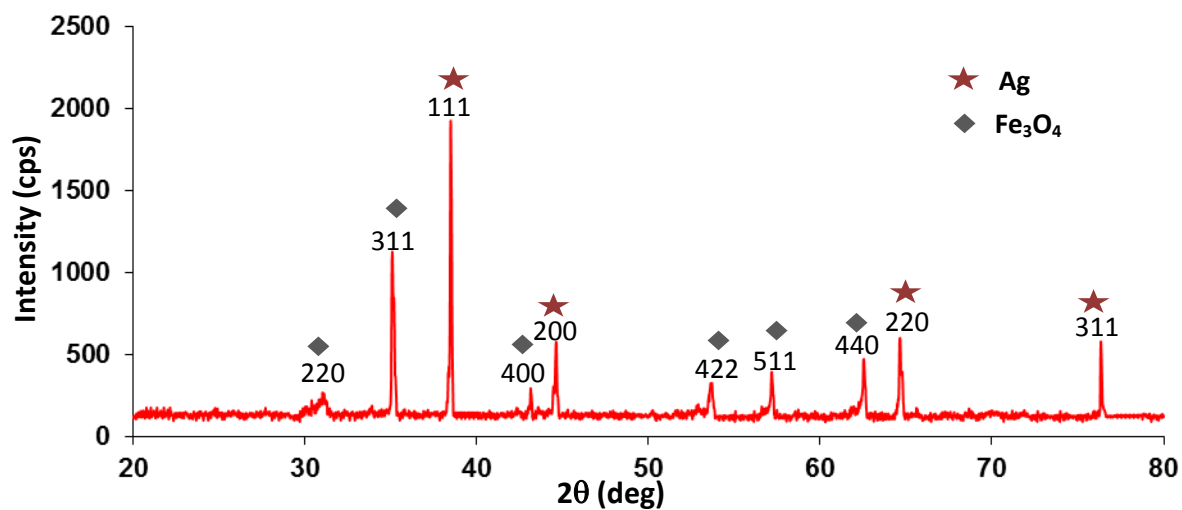

**Figure S21** X-Ray diffraction pattern of *in situ* generated  $\text{Ag}@\text{Fe}_3\text{O}_4$  NCs.

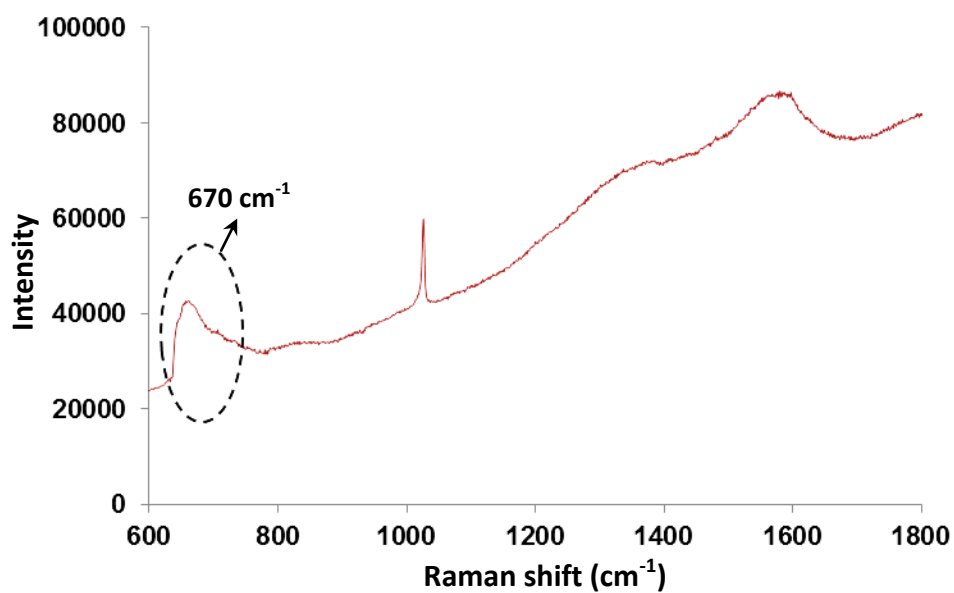

**Figure S22** Raman scattering spectrum of polythiophene **4** supported  $\text{Ag}@\text{Fe}_3\text{O}_4$  NCs showed the presence of band at  $670 \text{ cm}^{-1}$  corresponding to the  $A_{1g}$  vibration mode of  $\text{Fe}_3\text{O}_4$  NPs.



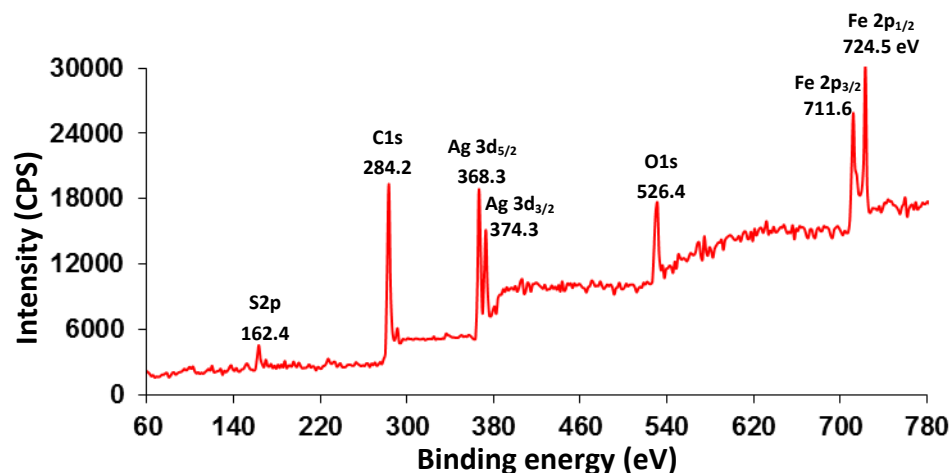

**Figure S23** XPS analysis of polythiophene **4** supported Ag@Fe<sub>3</sub>O<sub>4</sub> NCs indicated the presence of Ag<sup>0</sup> and Fe<sub>3</sub>O<sub>4</sub> species along with polythiophene.

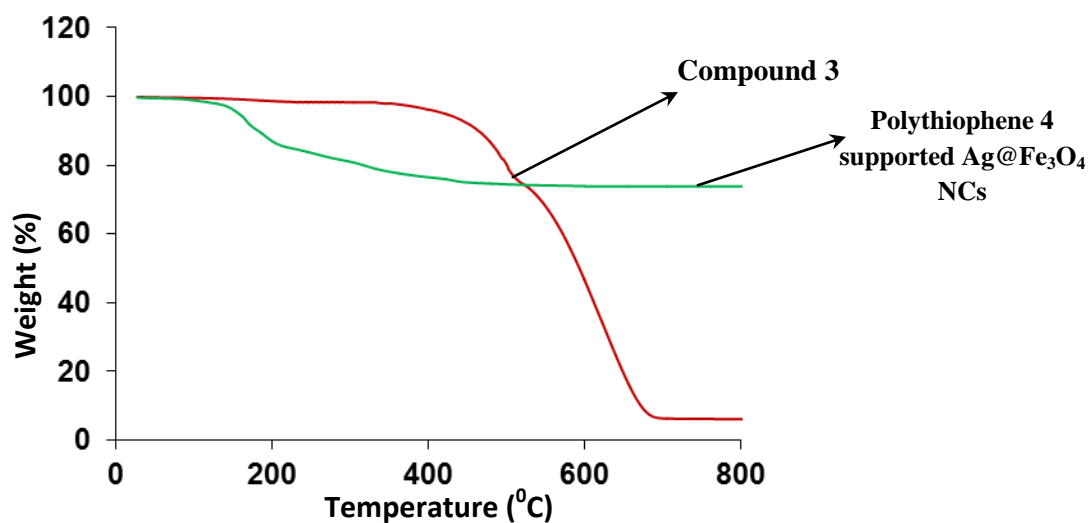

**Figure S24** TGA of compound **3** and polythiophene **4** supported Ag@Fe<sub>3</sub>O<sub>4</sub> NCs. This data indicated that polythiophene supported Ag@Fe<sub>3</sub>O<sub>4</sub> NCs consisted of 28.0 wt% of polythiophene as organic component.

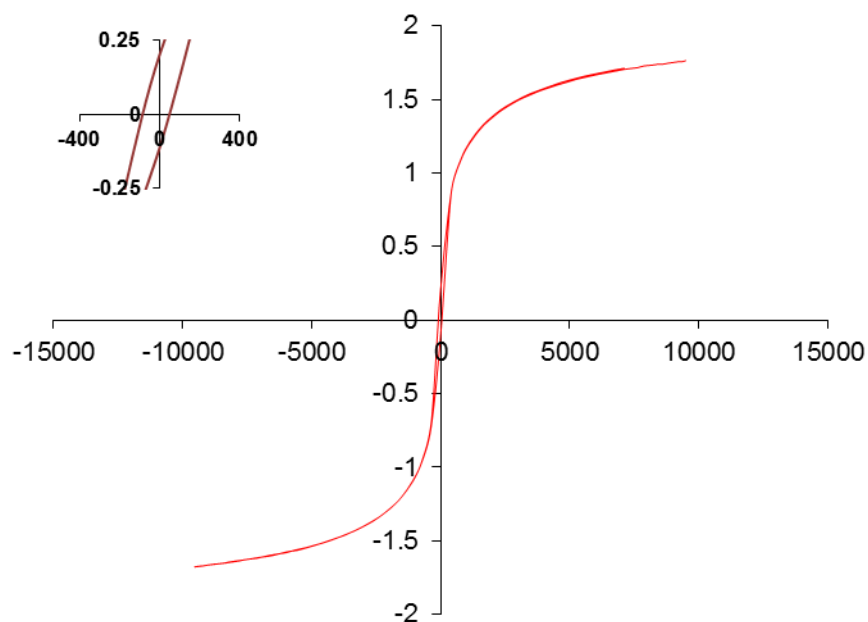

**Figure S25** Hysteresis loop of polythiophene **4** supported Ag@Fe<sub>3</sub>O<sub>4</sub> nanocomposites at room temperature (25°C). Inset showing expanded curve.

**Table S4** Showing the coercivity, magnetization values obtained from Hysteresis loop of polythiophene **4** supported Ag@Fe<sub>3</sub>O<sub>4</sub> nanocomposites at room temperature; 25°C.

| Parameter                             | Value   | Parameter definition                            |
|---------------------------------------|---------|-------------------------------------------------|
| H <sub>c</sub> (Oe)                   | 68.5    | Coercive Field: Field at which M/H changes sign |
| M <sub>r</sub> (emu g <sup>-1</sup> ) | 0.177   | Remanent Magnetization: M at H=0                |
| M <sub>s</sub> (emu g <sup>-1</sup> ) | 40.772  | Saturation Magnetization: maximum M measured    |
| S                                     | 0.00434 | Squareness = M <sub>r</sub> /M <sub>s</sub>     |

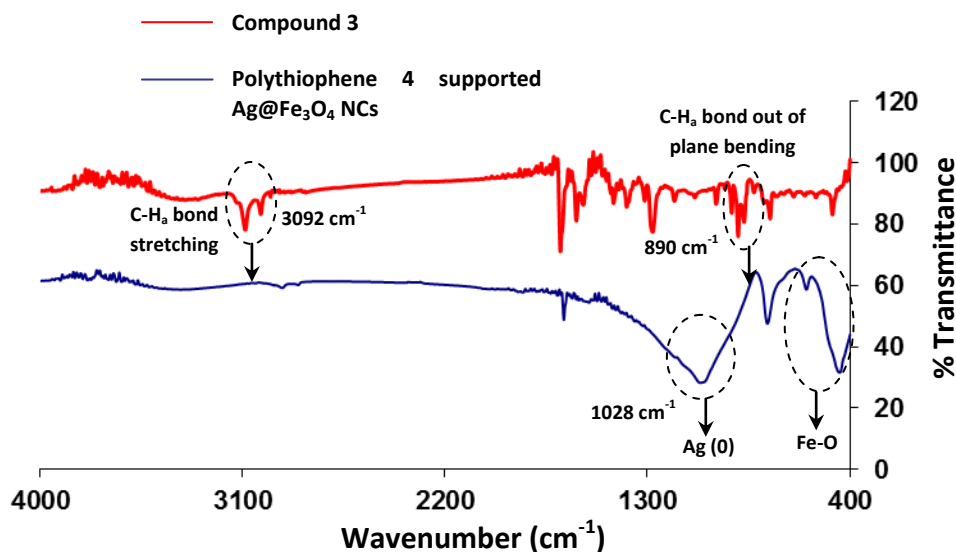

**Figure S26** FT-IR spectra of compound **3** and polythiophene **4** supported Ag@Fe<sub>3</sub>O<sub>4</sub> NCs showing disappearance of the bands at 3092 and 890 cm<sup>-1</sup> indicated the formation of polythiophene species through C-H<sub>a</sub> bonds. The peaks in the range of 400-600 cm<sup>-1</sup> and 1028 cm<sup>-1</sup> are associated with the stretching & torsional vibration modes of the Fe<sub>3</sub>O<sub>4</sub> NCs and Ag (0) respectively.

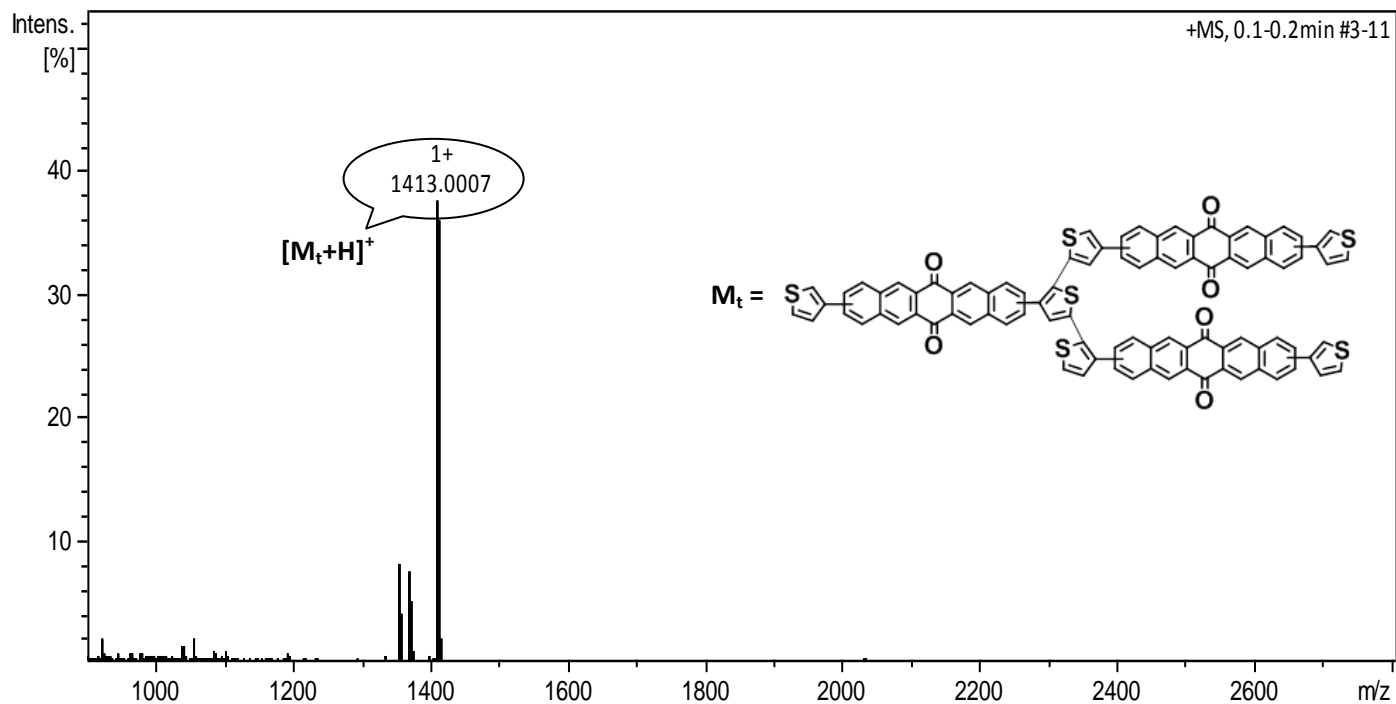

**Figure S27** ESI-MS spectrum of trimer formed after oxidation of compound **3** showed a parent ion peak correspond to [M<sub>t</sub>+H]<sup>+</sup>, m/z = 1413.0007.

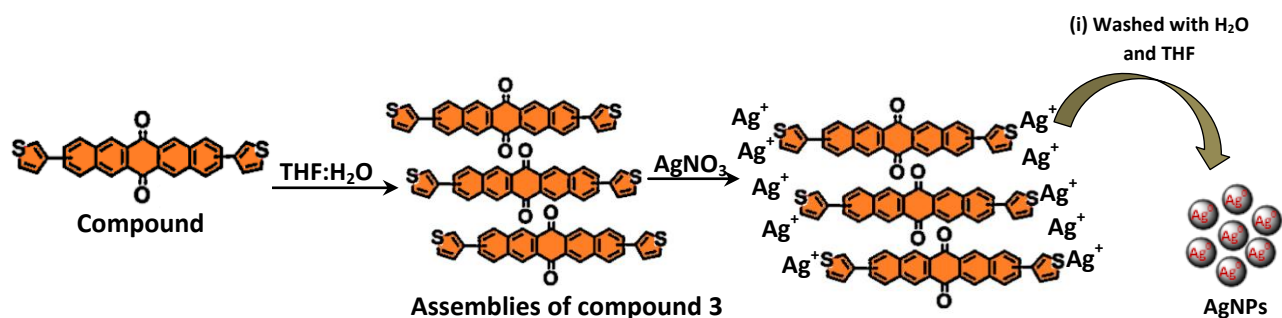

**Figure S28** Schematic illustration of preparation of AgNPs in presence of assemblies of compound 3.

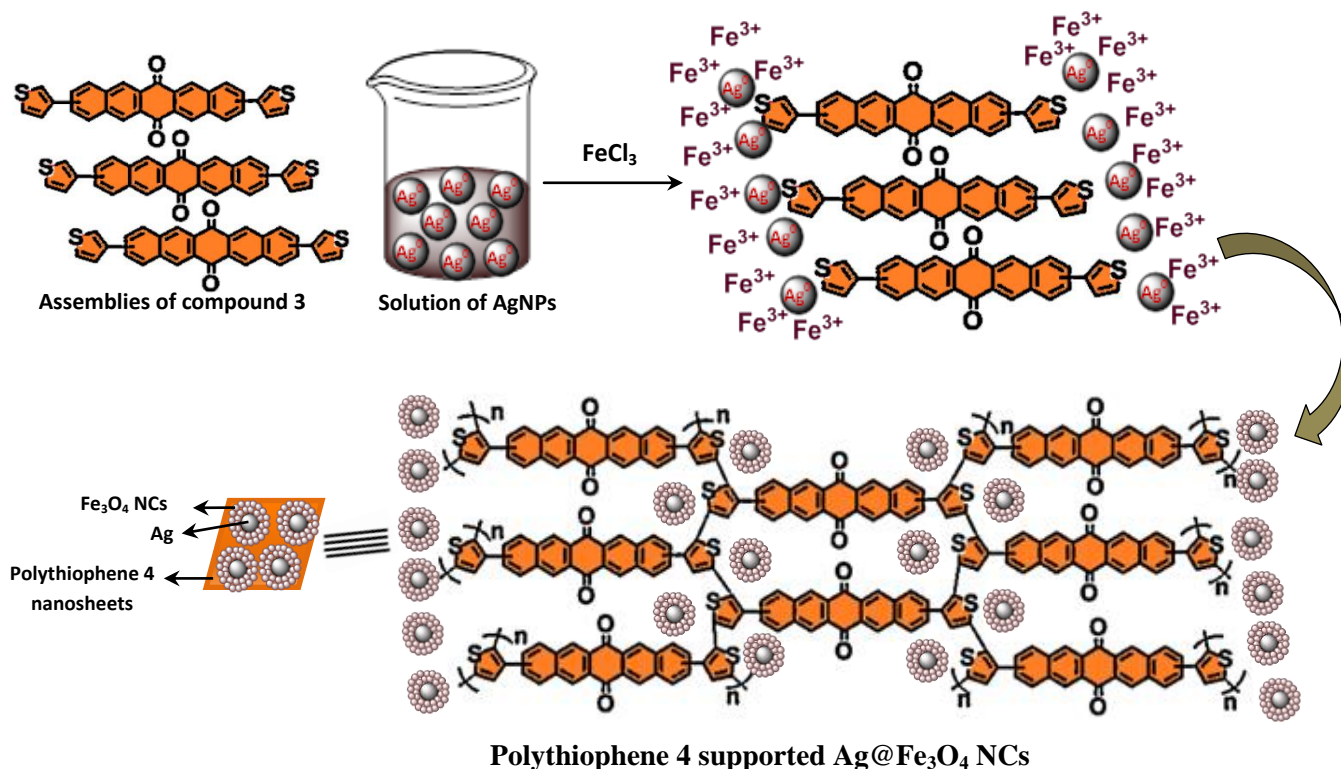

**Figure S29** Schematic presentation describing the preparation of polythiophene 4 supported Ag@Fe<sub>3</sub>O<sub>4</sub> NCs.

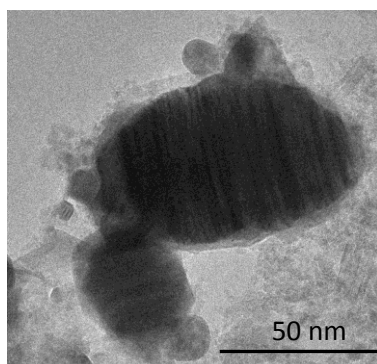

**2:1**  
**Ag@Fe<sub>3</sub>O<sub>4</sub>**

**Figure S30** TEM image showing the formation of Ag@Fe<sub>3</sub>O<sub>4</sub> NPs prepared by mixing AgNPs and Fe<sup>3+</sup> ions in 2:1 ratio showing larger sized core.

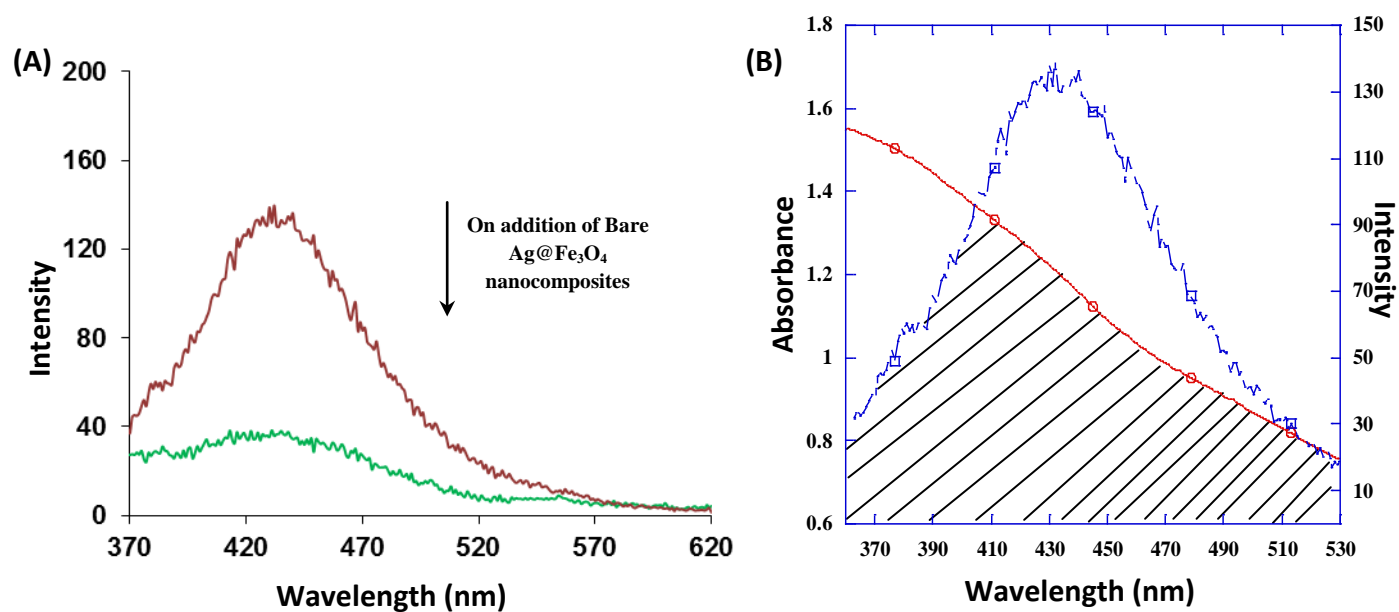

**Figure S31** (A) Fluorescence spectra of oxidized species **4** in H<sub>2</sub>O-THF (1:1) solvent mixture upon addition of bare Ag@Fe<sub>3</sub>O<sub>4</sub> nanocomposites. (B) Spectral overlap of absorption spectrum of Ag@Fe<sub>3</sub>O<sub>4</sub> NCs and fluorescence spectrum of oxidized species **4** in H<sub>2</sub>O-THF (1:1) mixture showing energy transfer from oxidized species **4** to Ag@Fe<sub>3</sub>O<sub>4</sub> NCs.

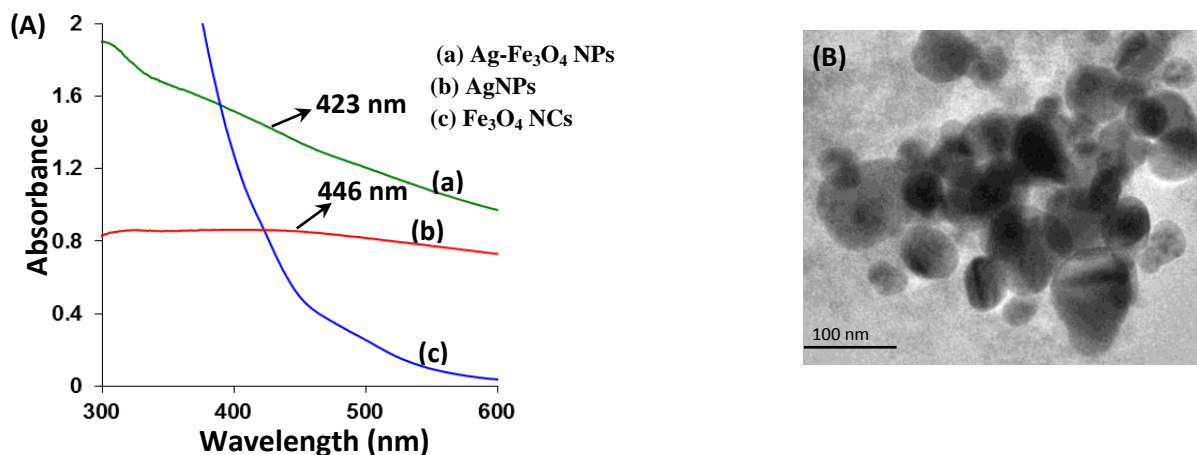

**Figure S32** (A) UV-vis spectra of aqueous solution of (a) bimetallic Ag-Fe<sub>3</sub>O<sub>4</sub> NPs (b) AgNPs (c) Fe<sub>3</sub>O<sub>4</sub> NCs stabilized by assemblies of compound **5**. (B) TEM image of Ag-Fe<sub>3</sub>O<sub>4</sub> NPs stabilized by assemblies of compound **5**.

**Table S5** Optimization of reaction conditions for dehydrogenative coupling of **6a** utilizing polythiophene **4** supported Ag@Fe<sub>3</sub>O<sub>4</sub> NCs (1:2) as photocatalyst.

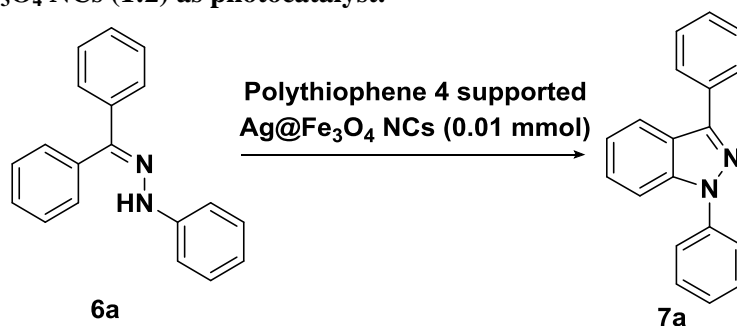

| S. No. | Reaction conditions                           | Time | Yield |
|--------|-----------------------------------------------|------|-------|
| 1.     | Toluene, 110°C                                | 10 h | 76%   |
| 2.     | Toluene:H <sub>2</sub> O, 110°C               | 9 h  | 75%   |
| 3.     | THF, 50°C                                     | 24 h | -     |
| 4.     | EtOH, 80°C                                    | 24 h | -     |
| 5.     | CH <sub>3</sub> CN, 80°C                      | 24 h | -     |
| 6.     | DMSO, 100°C                                   | 24 h | 25%   |
| 7.     | 1,4-dioxane, 100°C                            | 24 h | 30%   |
| 8.     | Toluene:H <sub>2</sub> O (1:1), visible light | 8h   | 78%   |

**Table S6 Influence of the stabilizing agent on the photocatalytic efficiency of Ag@Fe<sub>3</sub>O<sub>4</sub> nanocomposites in dehydrogenative coupling of phenylhydrazones**

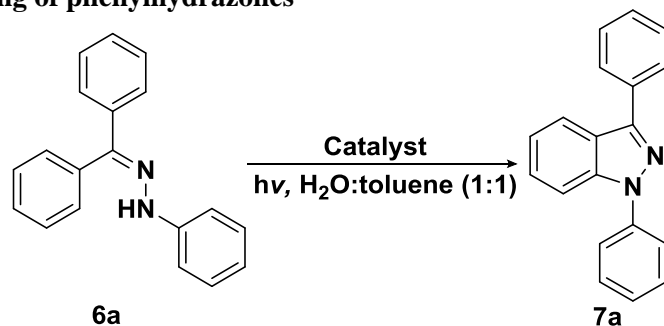

| S. No. | Catalyst/Reaction Conditions                                                                            | Time | Yield  | BET surface area (in m <sup>2</sup> /g) |
|--------|---------------------------------------------------------------------------------------------------------|------|--------|-----------------------------------------|
| 1.     | Polythiophene 4 supported Ag@Fe <sub>3</sub> O <sub>4</sub> NCs (1:2), hv                               | 8h   | 78%    | 48.18                                   |
| 2.     | Polythiophene 4, hv                                                                                     | 24 h | -      | 3.34                                    |
| 3.     | Bare AgNPs, hv                                                                                          | 24 h | -      | 2.63                                    |
| 4.     | Bare AgNPs + Polythiophene 4, hv                                                                        | 24 h | -      | 6.12                                    |
| 5.     | Bare Fe <sub>3</sub> O <sub>4</sub> NCs, hv                                                             | 24 h | Traces | 8.34                                    |
| 6.     | Bare Fe <sub>3</sub> O <sub>4</sub> NCs + Polythiophene 4, hv                                           | 24 h | Traces | 16.61                                   |
| 7.     | Bare Ag@Fe <sub>3</sub> O <sub>4</sub> nanocomposites, hv                                               | 24 h | 20%    | 20.30                                   |
| 8.     | Bare Ag@Fe <sub>3</sub> O <sub>4</sub> nanocomposites + Polythiophene 4, hv                             | 12 h | 62%    | 38.20                                   |
| 9.     | Assemblies of compound 5:Ag-Fe <sub>3</sub> O <sub>4</sub> , hv                                         | 24 h | 50%    | 34.31                                   |
| 10.    | Bare Ag@Fe <sub>3</sub> O <sub>4</sub> nanocomposites + Polythiophene 8, hv                             | 24 h | 22%    | 22.60                                   |
| 11.    | Bare Ag@Fe <sub>3</sub> O <sub>4</sub> nanocomposites + Polythiophene 8 + Benzoquinone (1.2 equiv.), hv | 24 h | 38%    | 27.01                                   |
| 12.    | Polythiophene 4 supported ellipsoidal shaped Ag@Fe <sub>3</sub> O <sub>4</sub> NCs (2:1), hv            | 10 h | 67%    | 42.16                                   |

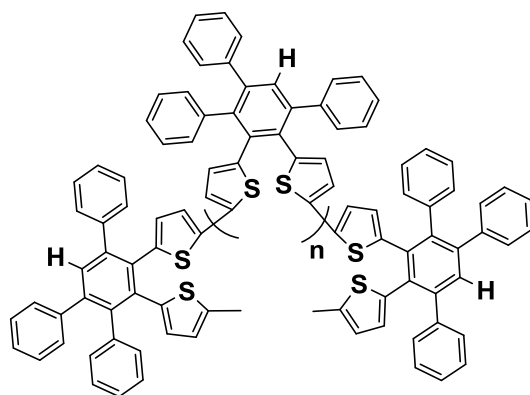

**Polythiophene 8**

**Figure S33** Structure of polythiophene 8.

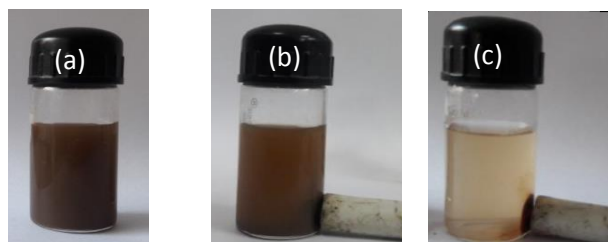

**Figure S34** Polythiophene supported Ag@Fe<sub>3</sub>O<sub>4</sub> NCs (a) separated aqueous layer after completion of model reaction; (b) a magnetic stirring bar put towards the aqueous layer; (c) an external magnet attracted Ag@Fe<sub>3</sub>O<sub>4</sub> NCs.

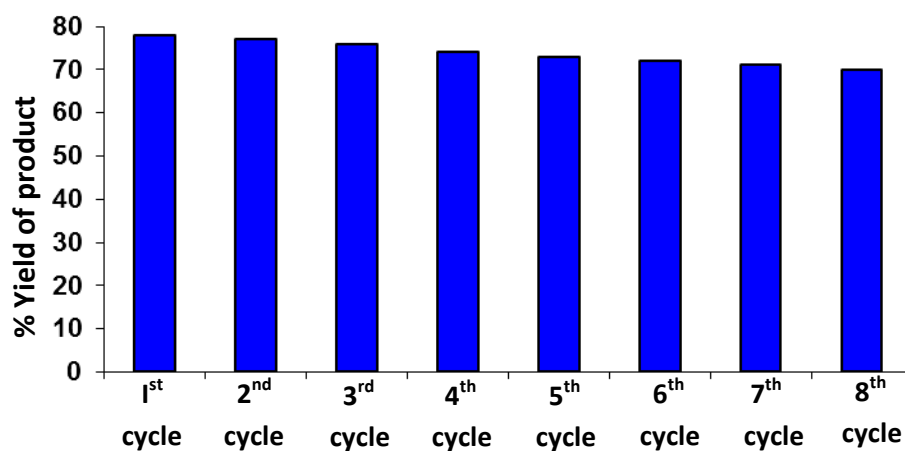

**Figure S35** Recyclability of polythiophene **4** supported Ag@Fe<sub>3</sub>O<sub>4</sub> NCs as photocatalyst for synthesis of indazole compounds.



**Table S7 Effect of addition of TEMPO on dehydrogenative coupling of benzophenone phenylhydrazone, 6a in presence of polythiophene 4 supported Ag@Fe<sub>3</sub>O<sub>4</sub> NCs as photocatalyst.**

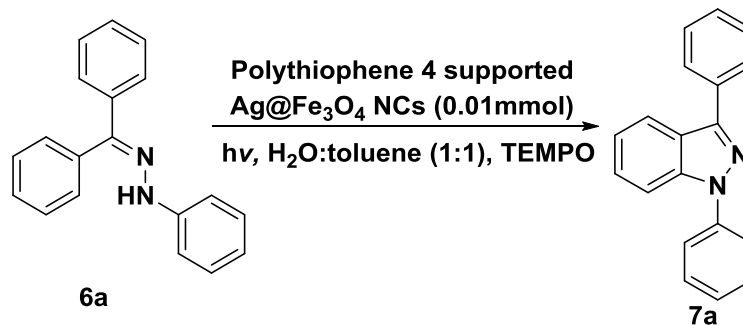

| S. No. | TEMPO      | Yield of 7a |
|--------|------------|-------------|
| 1.     | 0 equiv.   | 78%         |
| 2.     | 1.0 equiv. | 46%         |
| 3.     | 2.0 equiv. | 15%         |

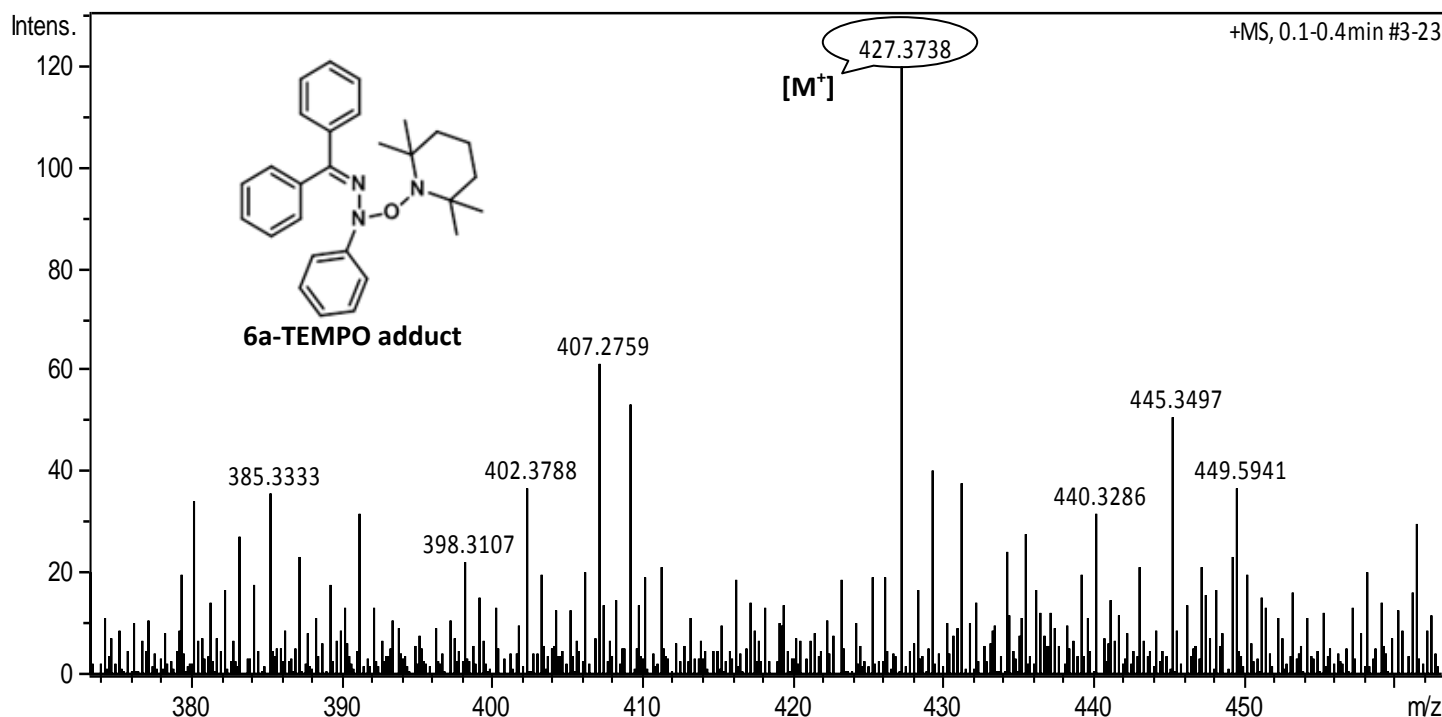

**Figure S36 Mass spectrum of 6a-TEMPO adduct**

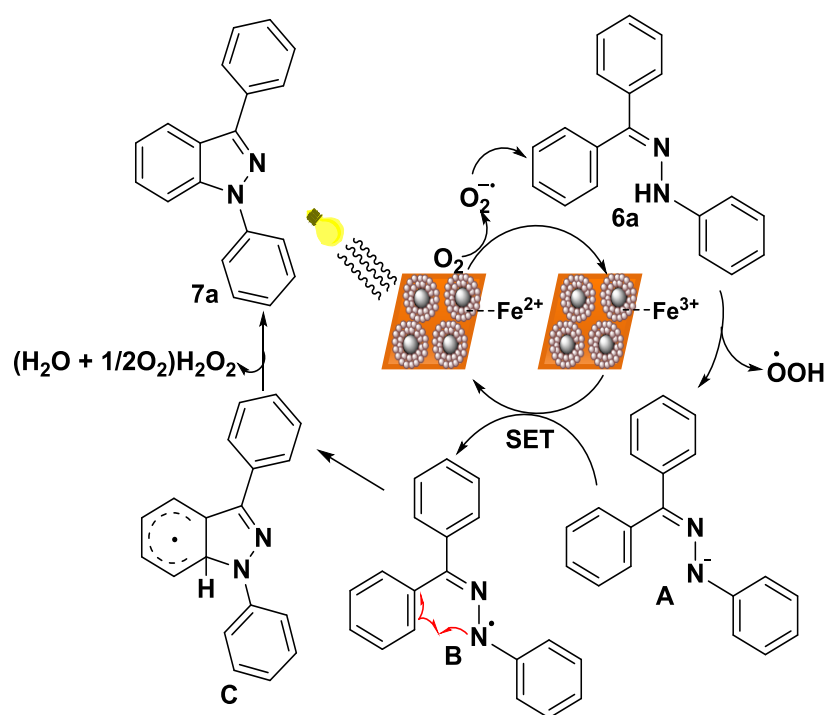

**Scheme S4** Plausible mechanism of dehydrogenative coupling of **6a** utilizing polythiophene **4** supported Ag@Fe<sub>3</sub>O<sub>4</sub> NCs as photocatalyst

**Compound 7a**<sup>2</sup> White solid; 1,3-Diphenyl-1*H*-indazole: (77 mg in 78% yield). <sup>1</sup>H NMR (500 MHz, CDCl<sub>3</sub>)  $\delta$  = 8.10 (d, *J* = 8.0 Hz, 1H), 8.05 (d, *J* = 8.0 Hz, 2H), 7.82-7.79 (m, 3H), 7.58-7.52 (m, 4H), 7.48-7.43 (m, 2H), 7.38 (t, *J* = 7.5 Hz, 1H), 7.30 (t, *J* = 7.5 Hz, 1H) ppm.

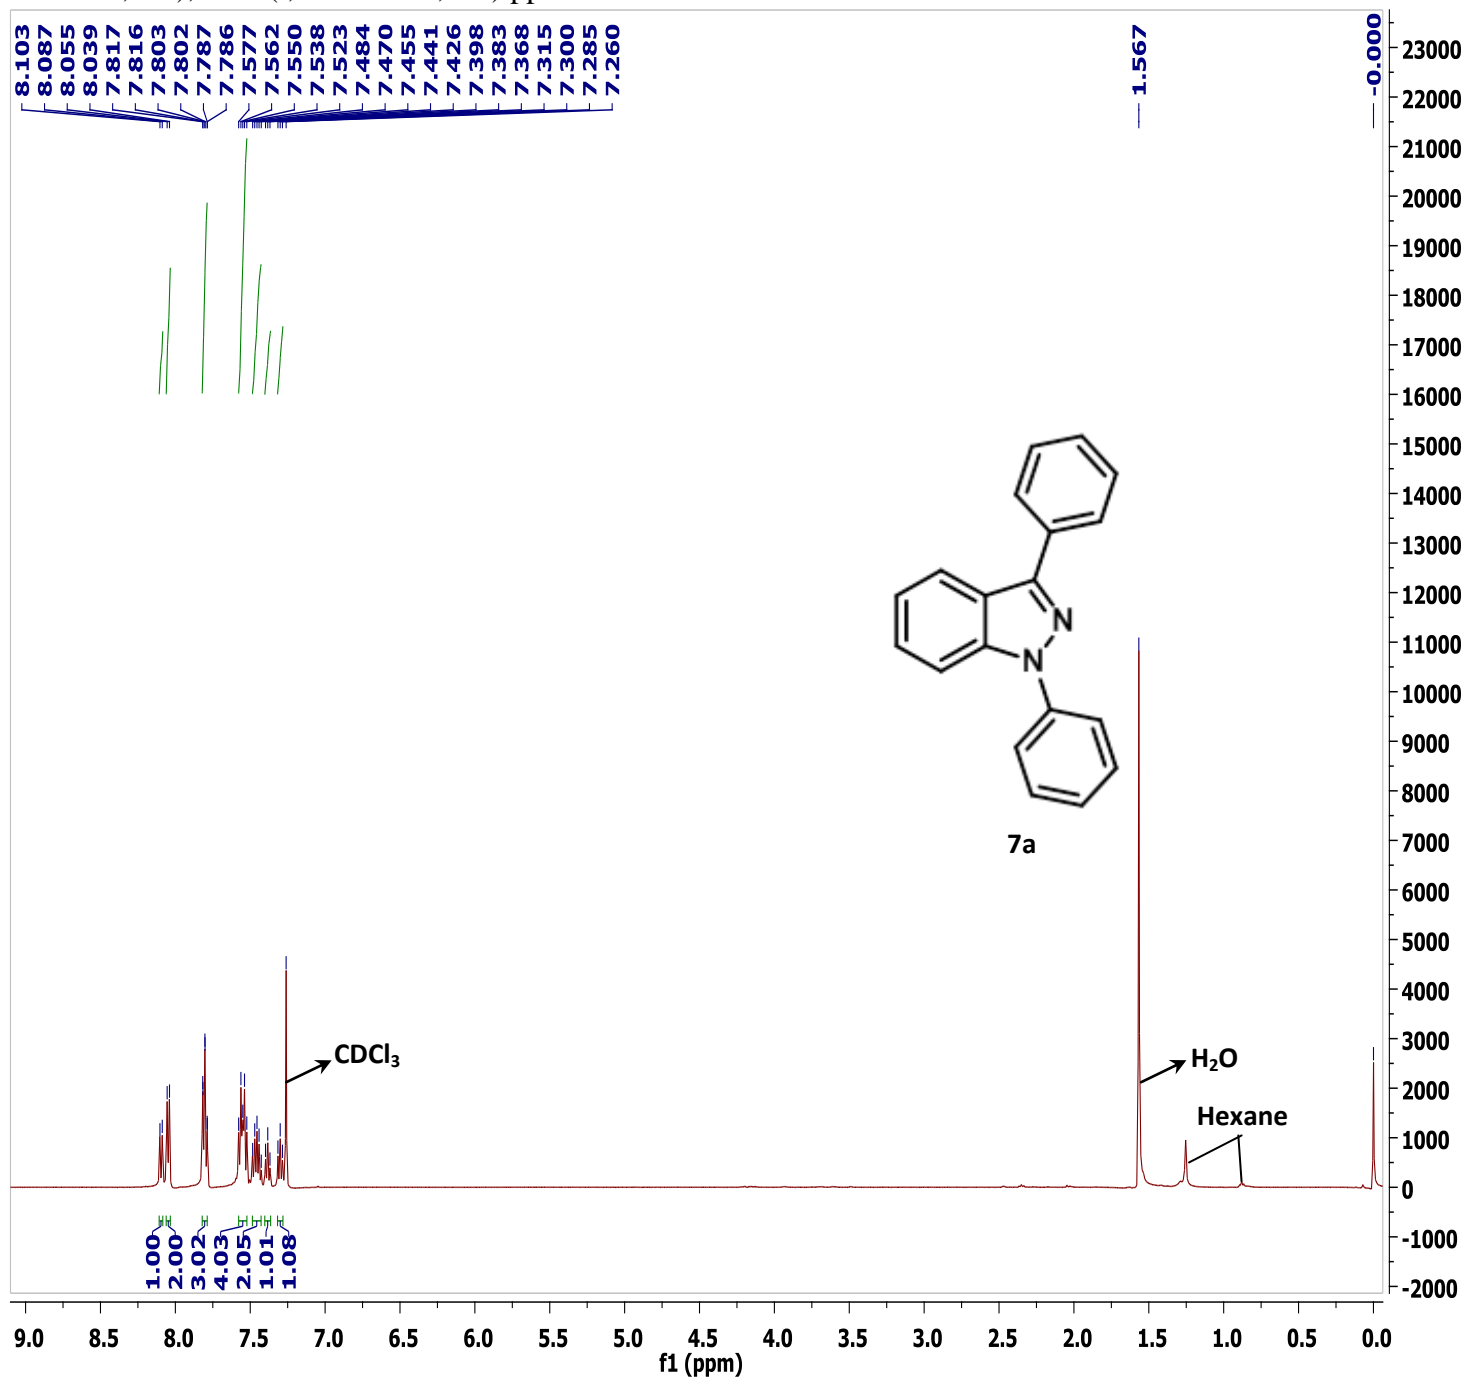

**Figure S37** <sup>1</sup>H NMR of compound 7a in CDCl<sub>3</sub>

**Compound 7b**<sup>9</sup> Gray solid; 3-(4-Fluoro-phenyl)-1-phenyl-1*H*-indazole: (63 mg in 64% yield). <sup>1</sup>H NMR (500 MHz, CDCl<sub>3</sub>) δ = 8.04-7.99 (m, 3 H), 7.80-7.78 (m, 3 H), 7.58-7.53 (m, 2 H), 7.49-7.45 (m, 1 H), 7.42-7.37 (m, 1 H), 7.32-7.29 (m, 1 H), 7.24-7.21 (m, 2 H) ppm.

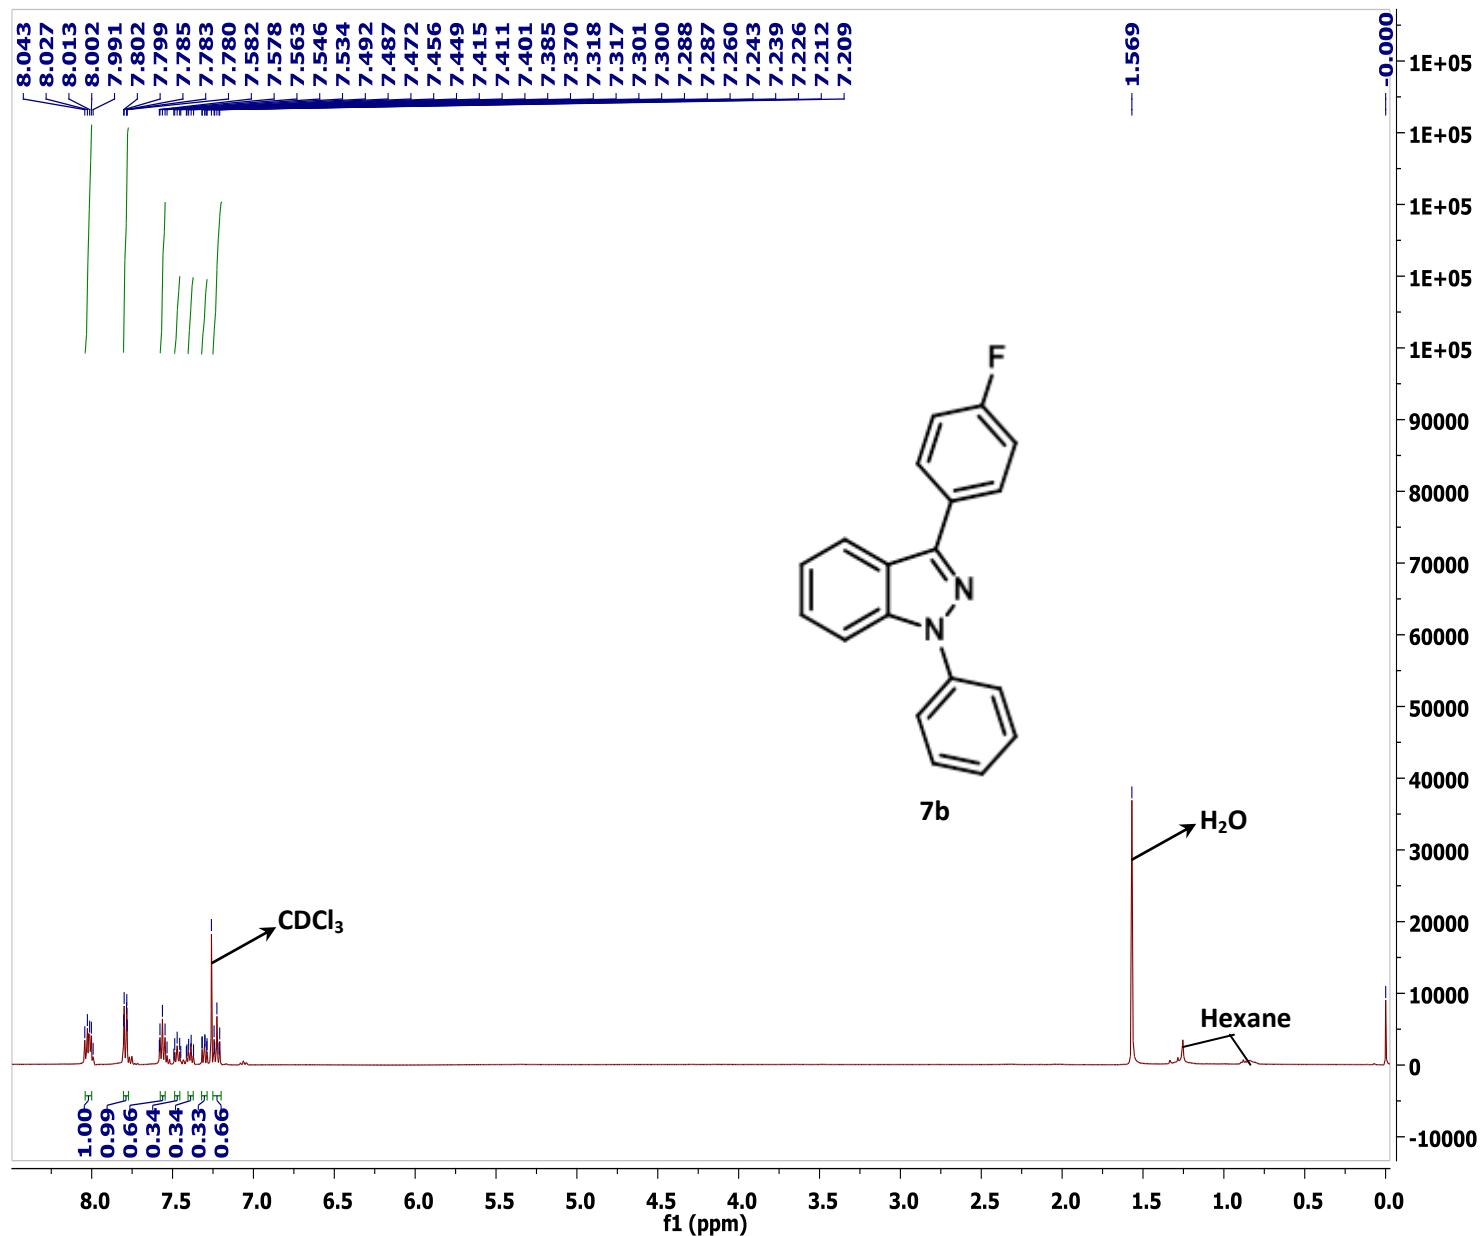

**Figure S38** <sup>1</sup>H NMR of compound **7b** in CDCl<sub>3</sub>

**Compound 7c**<sup>10</sup> Pale yellow solid; 3-(4-Chloro-phenyl)-1-phenyl-1*H*-indazole: (65 mg in 66% yield).

<sup>1</sup>H NMR (400 MHz, CDCl<sub>3</sub>)  $\delta$  = 8.05 (d, *J* = 8.4 Hz, 1H), 7.99 (d, *J* = 8.4 Hz, 2H), 7.79 (d, *J* = 7.6 Hz, 3 H), 7.57 (t, *J* = 8.0 Hz, 2H), 7.52-7.46 (m, 3H), 7.40 (t, *J* = 7.6 Hz, 1H), 7.31 (t, *J* = 7.6 Hz, 1H) ppm.

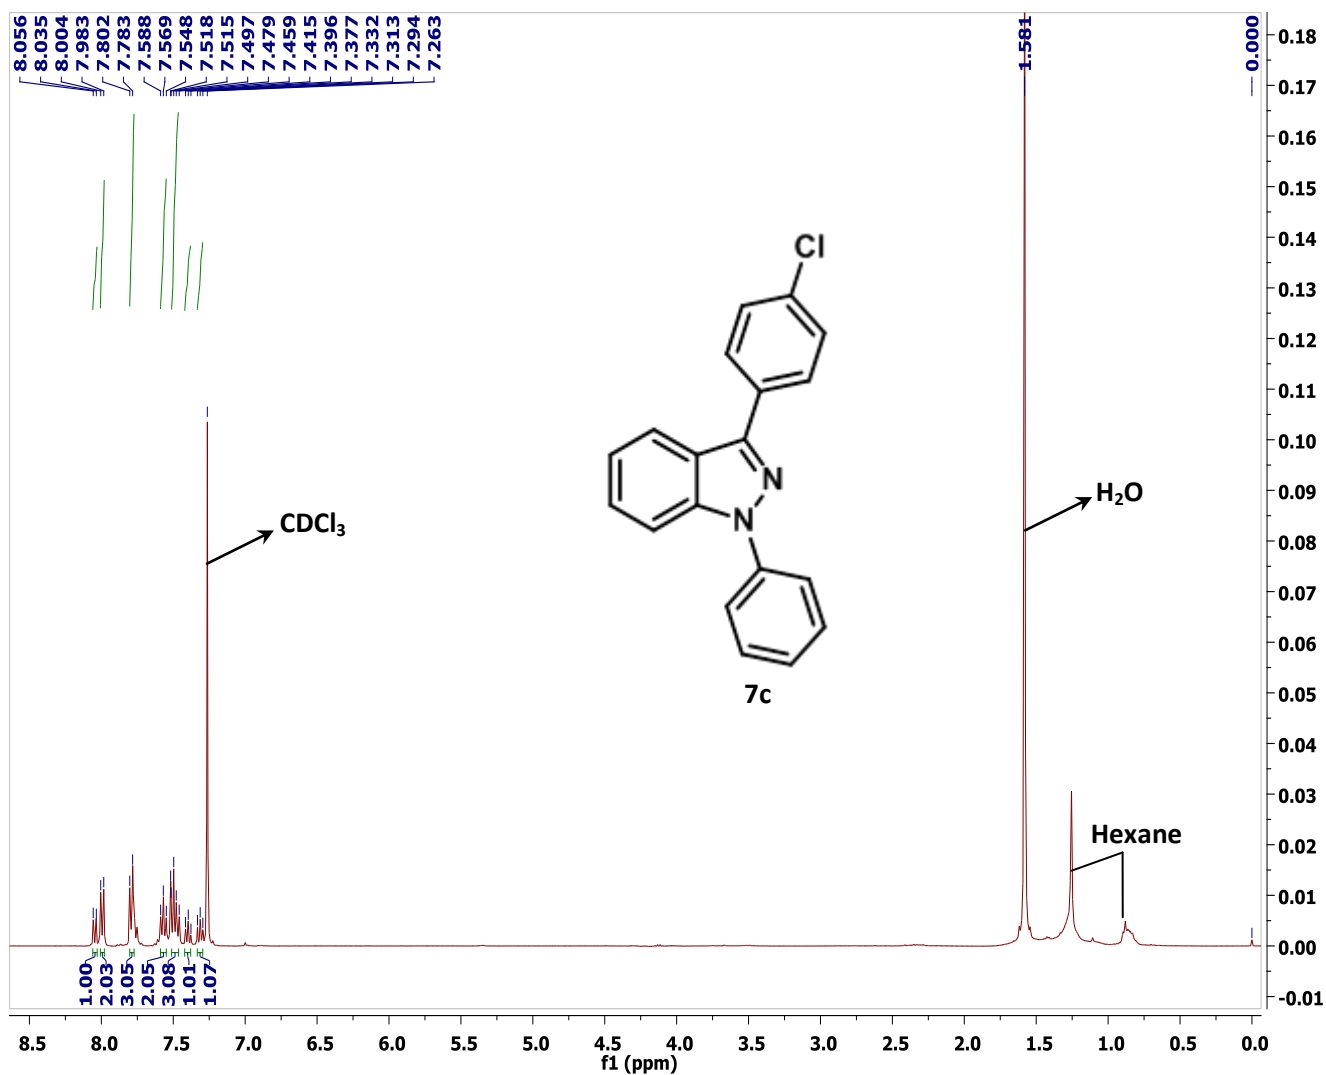

**Figure S39** <sup>1</sup>H NMR of compound 7c in CDCl<sub>3</sub>

**Compound 7d**<sup>9</sup> White solid; 3-(4-Bromo-phenyl)-1-phenyl-1*H*-indazole: (69 mg in 70% yield). <sup>1</sup>H NMR (500 MHz, CDCl<sub>3</sub>) δ = 8.05-8.03 (m, 1 H), 7.93 (d, *J* = 8.5 Hz, 2 H), 7.80-7.78 (m, 3 H), 7.66 (d, *J* = 8.5 Hz, 2 H), 7.59-7.55 (m, 2 H), 7.49-7.46 (m, 1 H), 7.41-7.38 (m, 1 H), 7.33-7.29 (m, 1 H) ppm.

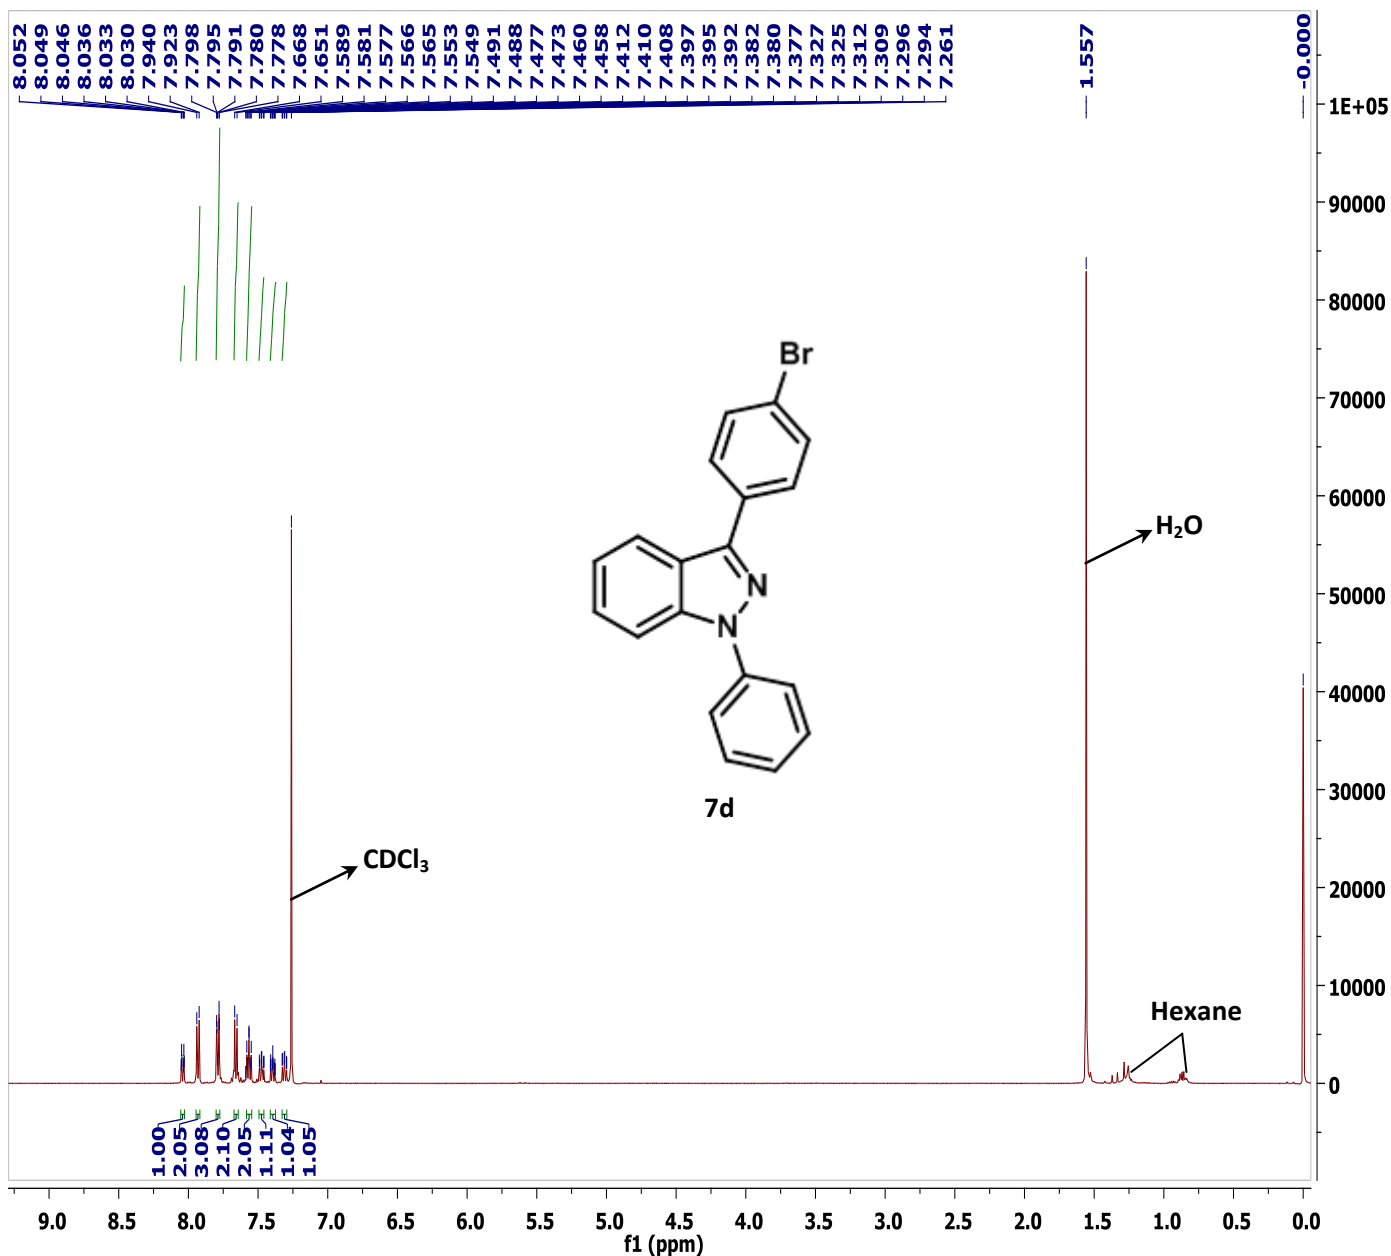

**Figure S40** <sup>1</sup>H NMR of compound **7d** in CDCl<sub>3</sub>

**Compound 7e<sup>2</sup>** Light yellow solid; 6-Fluoro-3-(4-fluoro-phenyl)-1-phenyl-1*H*-indazole: (64 mg in 65% yield). <sup>1</sup>H NMR (500 MHz, CDCl<sub>3</sub>) δ = 7.99 -7.94 (m, 3H), 7.75 (d, *J* = 8.0 Hz, 2H), 7.57 (t, *J* = 7.5 Hz, 2H), 7.43-7.39 (m, 2H), 7.23 (t, *J* = 8.8 Hz, 2H), 7.07 (dt, *J* = 9.0, 2.0 Hz, 1H) ppm.

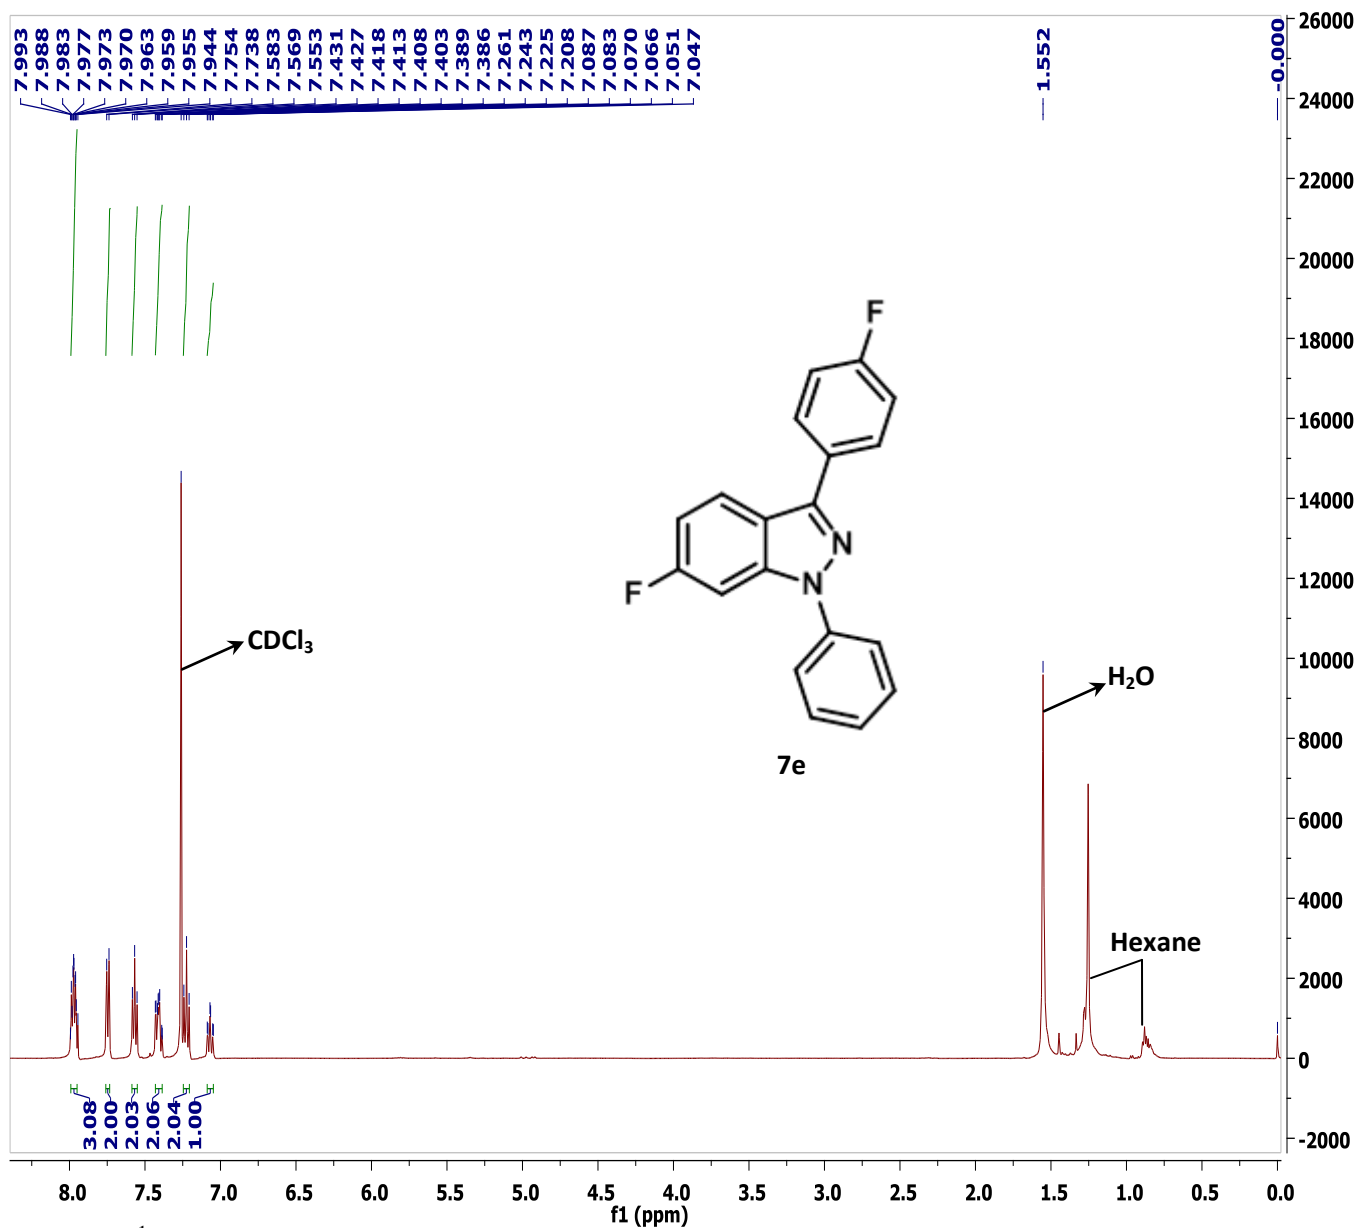

**Figure S41** <sup>1</sup>H NMR of compound **7e** in CDCl<sub>3</sub>

**Compound 7f**<sup>2, 11</sup> White solid; 6-Chloro-3-(4-chloro-phenyl)-1-phenyl-1*H*-indazole: (67 mg in 68% yield).

<sup>1</sup>H NMR (500 MHz, CDCl<sub>3</sub>)  $\delta$  = 7.96 -7.93 (m, 3H), 7.76 -7.73 (m, 3H), 7.58 (t, *J* = 8.0 Hz, 2H), 7.50 (d, *J* = 8.5 Hz, 2H), 7.42 (t, *J* = 7.5 Hz, 1H), 7.28-7.27 (m, 1H) ppm.

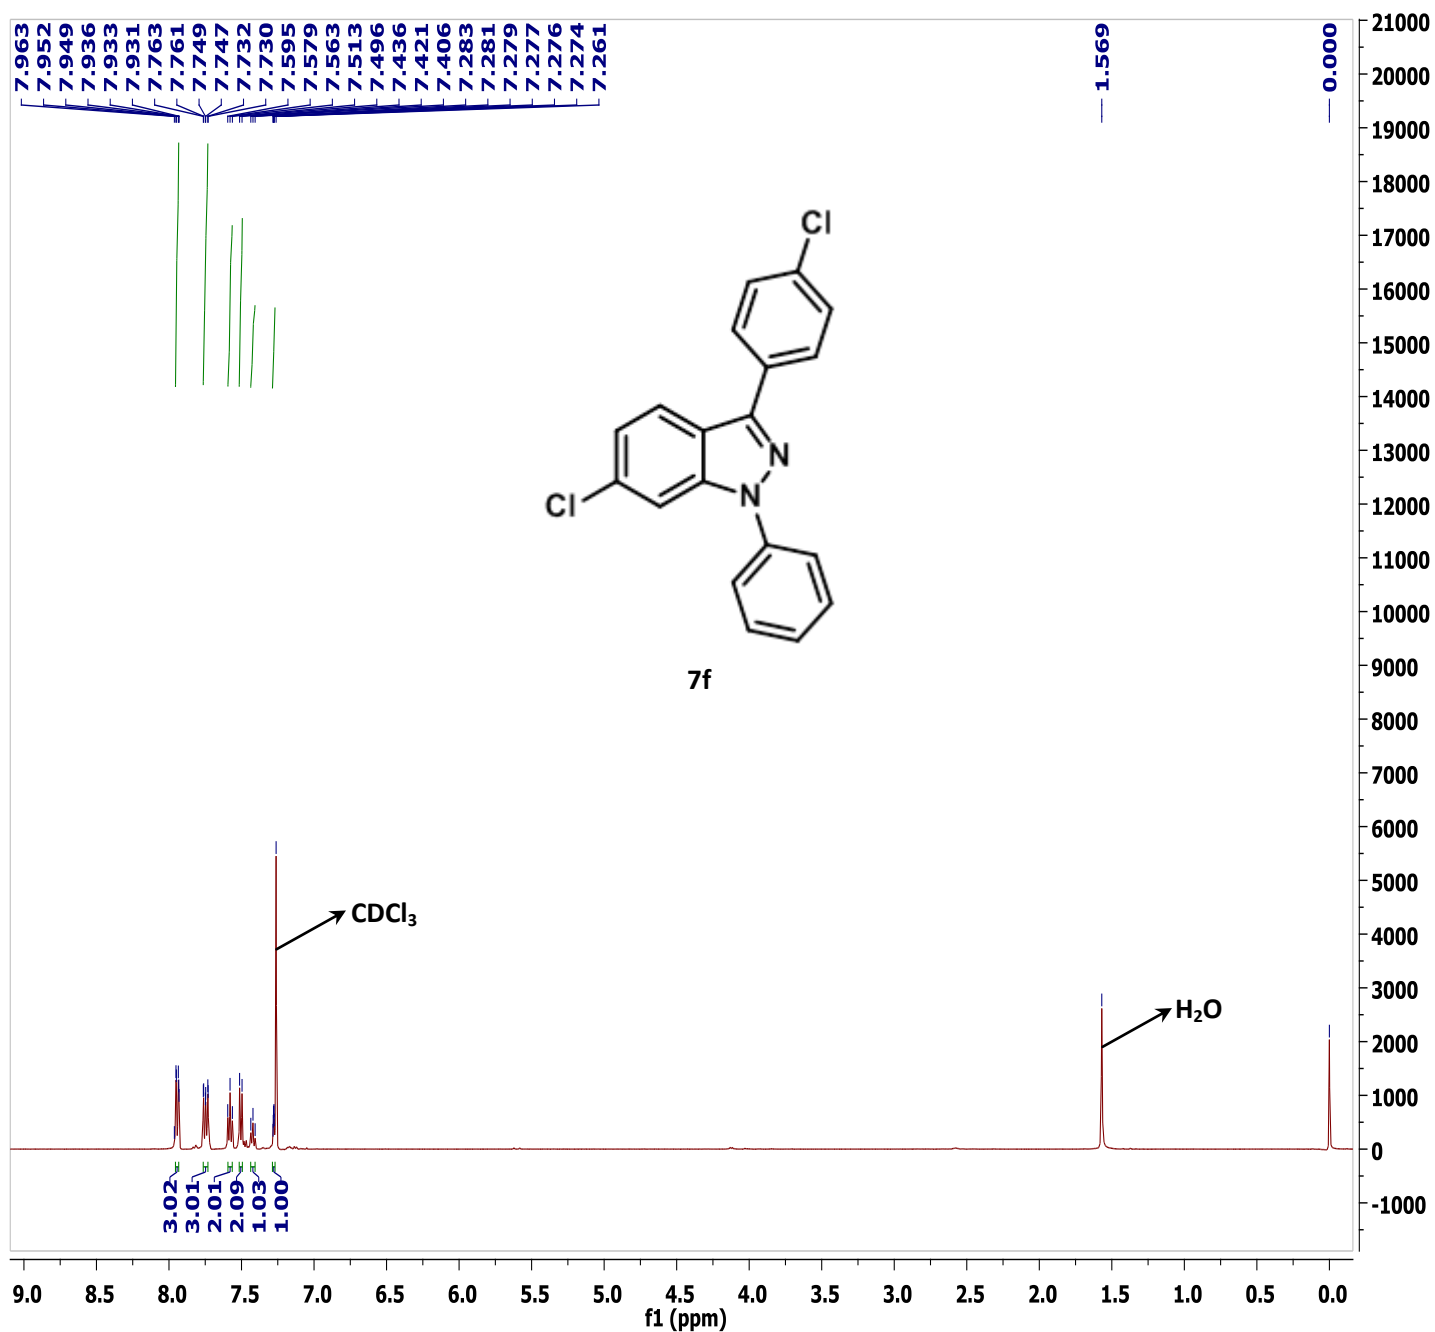



**Compound 7g**<sup>12</sup> White solid; 6-Methyl-1-phenyl-3-p-tolyl-1*H*-indazole: (84 mg in 85% yield). <sup>1</sup>H NMR (400 MHz, CDCl<sub>3</sub>)  $\delta$  = 7.96-7.91 (m, 3H), 7.79 (d, *J* = 8.4 Hz, 2H), 7.57-7.51 (m, 3H), 7.38-7.32 (m, 3H), 7.12 (d, *J* = 8.4 Hz, 1H), 2.53 (s, 3H), 2.44 (s, 3H) ppm.

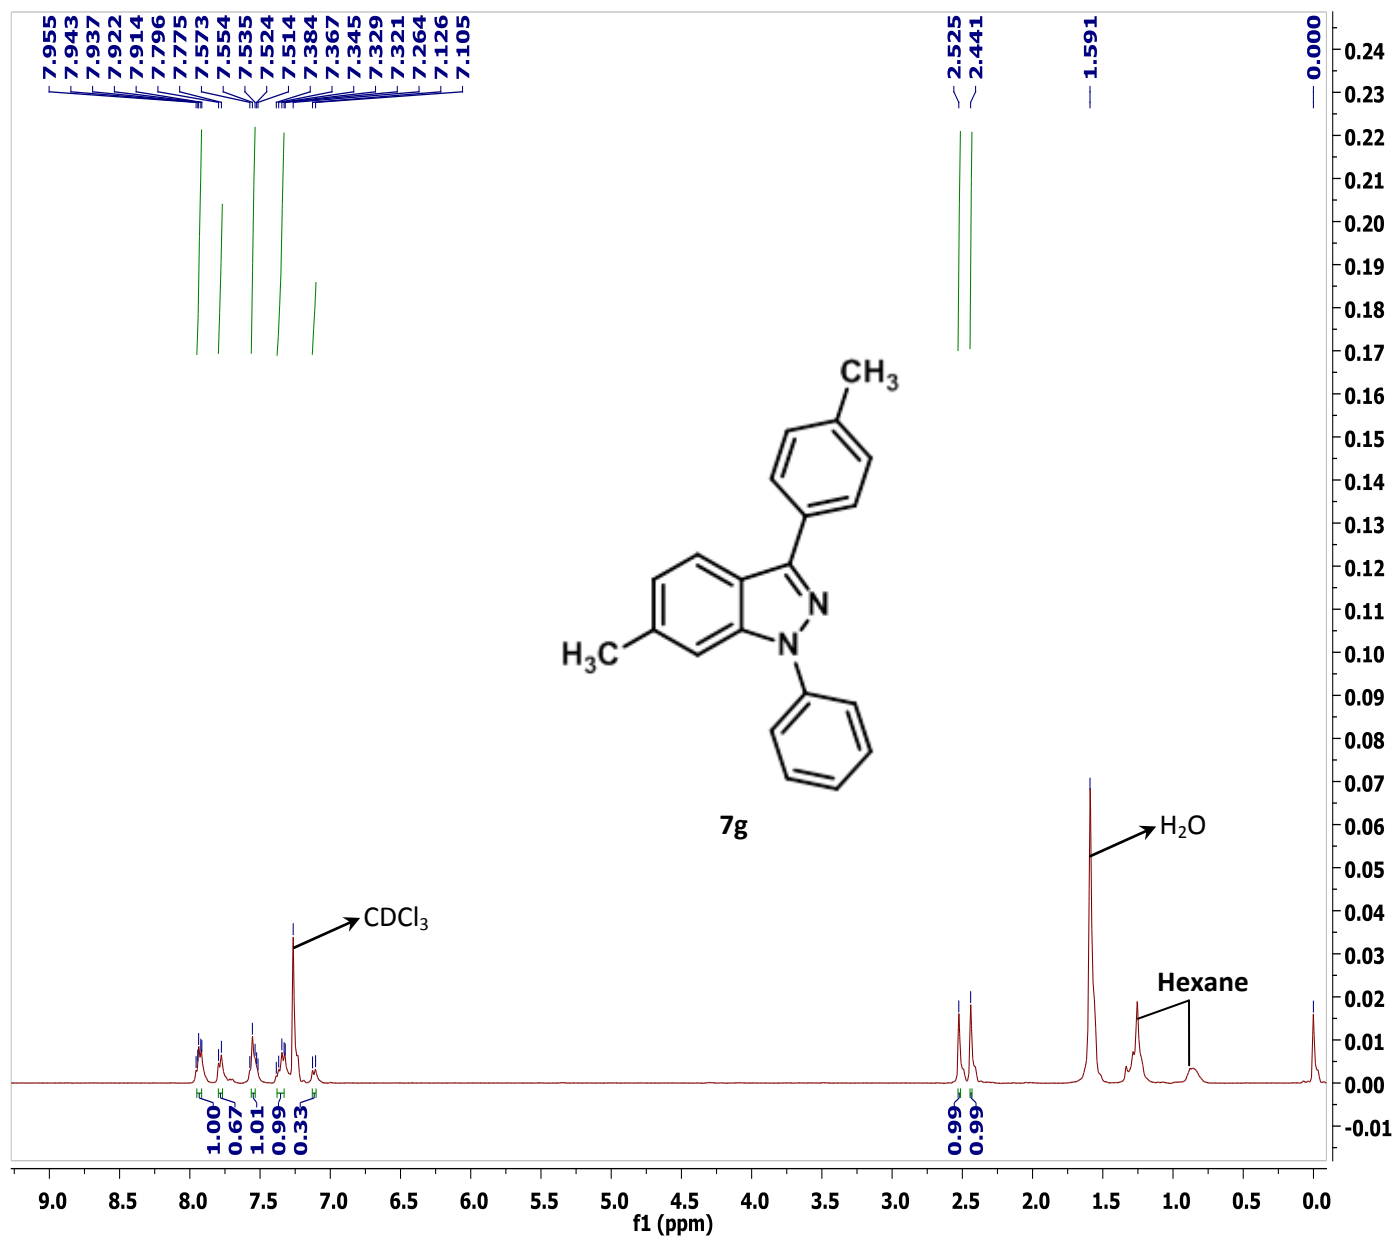

**Figure S43** <sup>1</sup>H NMR of compound 7g in CDCl<sub>3</sub>

**Compound 7h**<sup>11</sup> Light brown solid; 6-Methoxy-3-(4-methoxy-phenyl)-1-phenyl-1*H*-indazole: (89 mg in 90% yield). <sup>1</sup>H NMR (400 MHz, CDCl<sub>3</sub>) δ = 7.94 (d, *J* = 8.8 Hz, 2H), 7.89 (d, *J* = 9.2 Hz, 1H), 7.77 (d, *J* = 7.6 Hz, 2H), 7.55 (t, *J* = 7.6 Hz, 2H), 7.37 (t, *J* = 7.2 Hz, 1H), 7.11 (d, *J* = 2.0 Hz, 1H), 7.05 (d, *J* = 8.8 Hz, 2H), 6.92 (dd, *J* = 8.8, 2.0 Hz, 1H), 3.88 (s, 6H) ppm.

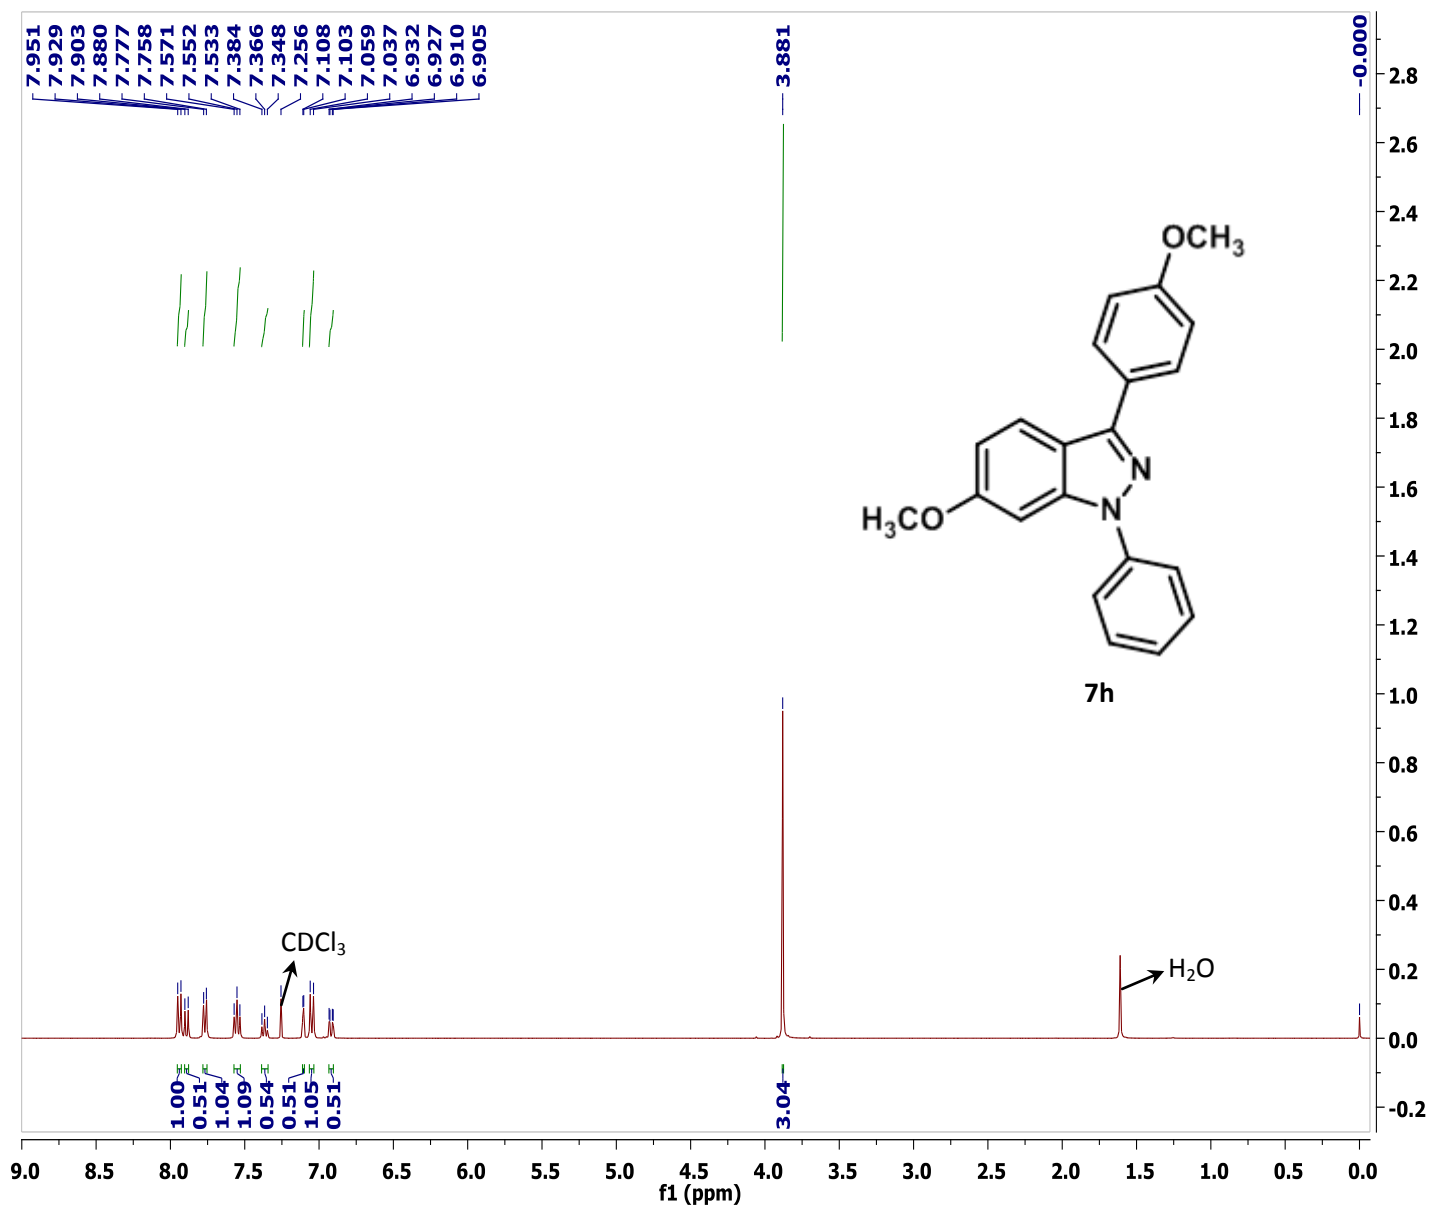

**Figure S44** <sup>1</sup>H NMR of compound **7h** in CDCl<sub>3</sub>

**Compound 7i**<sup>11</sup> White solid; 1-Phenyl-3-*p*-tolyl-1*H*-indazole: (74 mg in 75% yield). <sup>1</sup>H NMR (500 MHz, CDCl<sub>3</sub>)  $\delta$  = 8.03 (d, *J* = 7.5 Hz, 2H), 7.96 (d, *J* = 8.0 Hz, 1H), 7.79 (d, *J* = 7.5 Hz, 2H), 7.58-7.50 (m, 5H), 7.44-7.35 (m, 2H), 7.13 (d, *J* = 8.5 Hz, 1H), 2.53 (s, 3H) ppm.

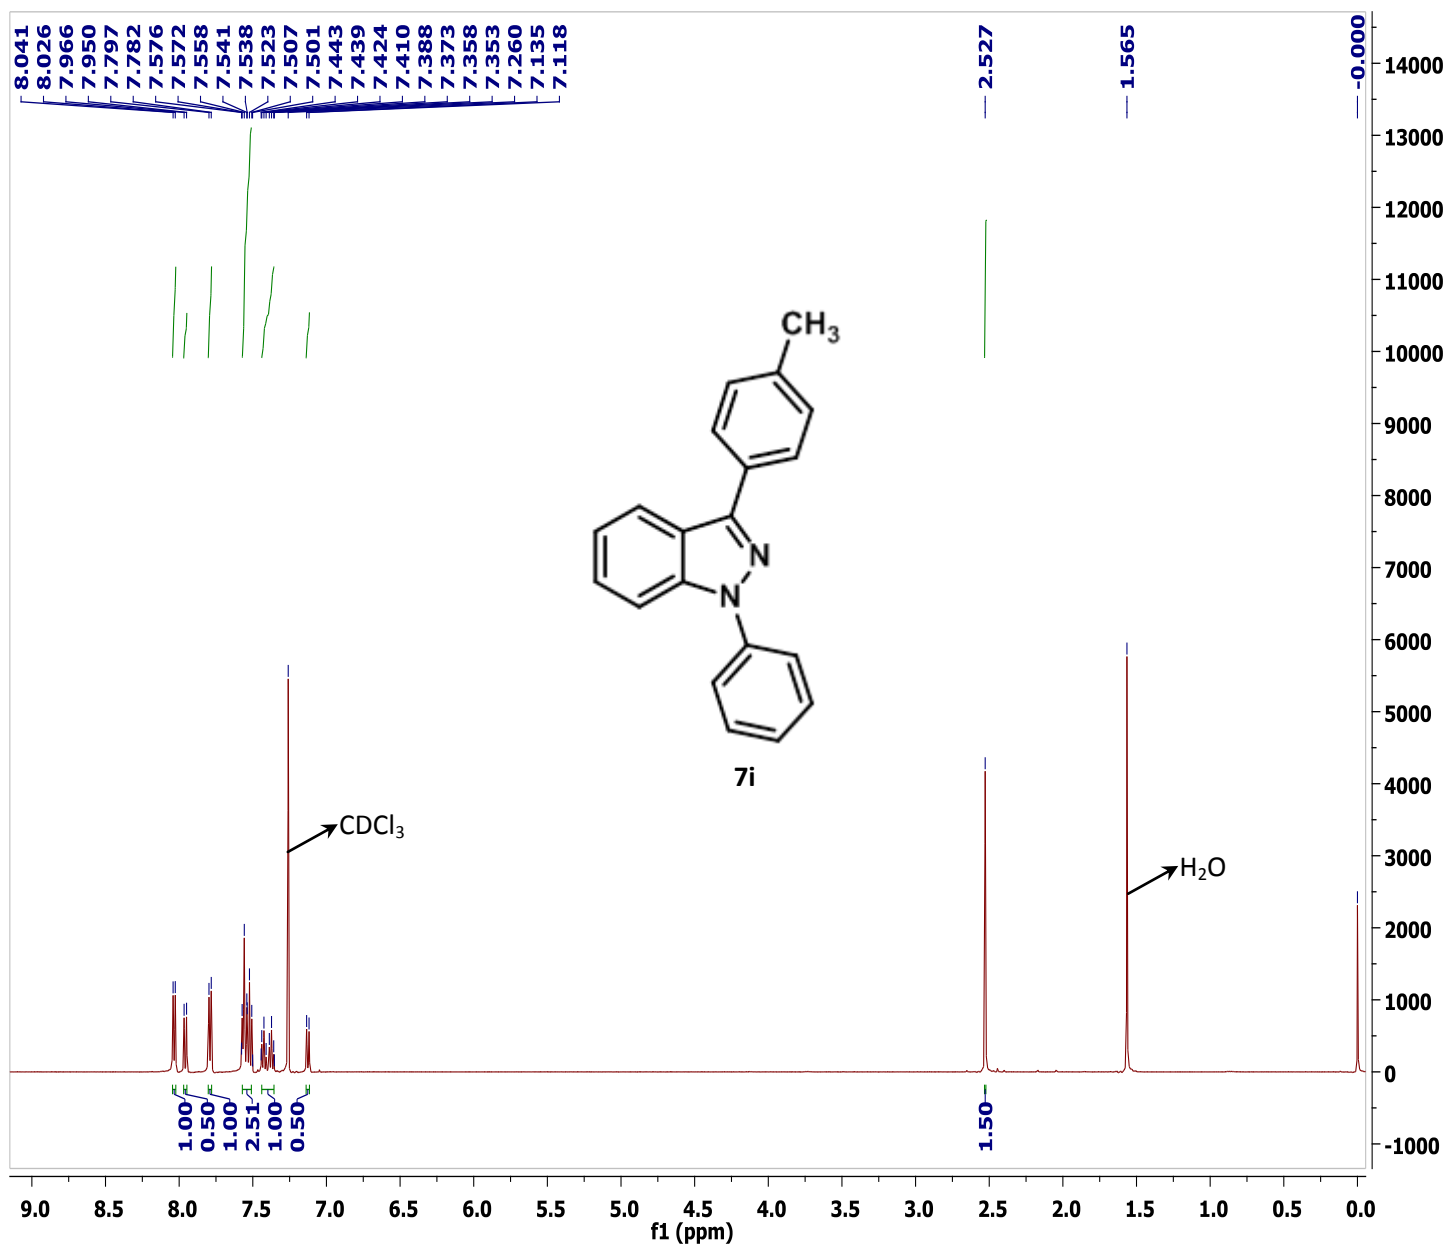

**Figure S45** <sup>1</sup>H NMR of compound **7i** in CDCl<sub>3</sub>

**Compound 7j**<sup>11</sup> White solid; 6-Methoxy-1,3-diphenyl-1*H*-indazole: (83 mg in 84% yield). <sup>1</sup>H NMR (500 MHz, CDCl<sub>3</sub>) δ = 8.01 (d, *J* = 7.5 Hz, 2H), 7.93 (d, *J* = 9.0 Hz, 1H), 7.78 (d, *J* = 8.0 Hz, 2H), 7.58-7.50 (m, 4H), 7.44-7.37 (m, 2H), 7.12 (d, *J* = 2.0 Hz, 1H), 6.94 (dd, *J* = 9.0, 2.0 Hz, 1H), 3.89 (s, 3H) ppm.

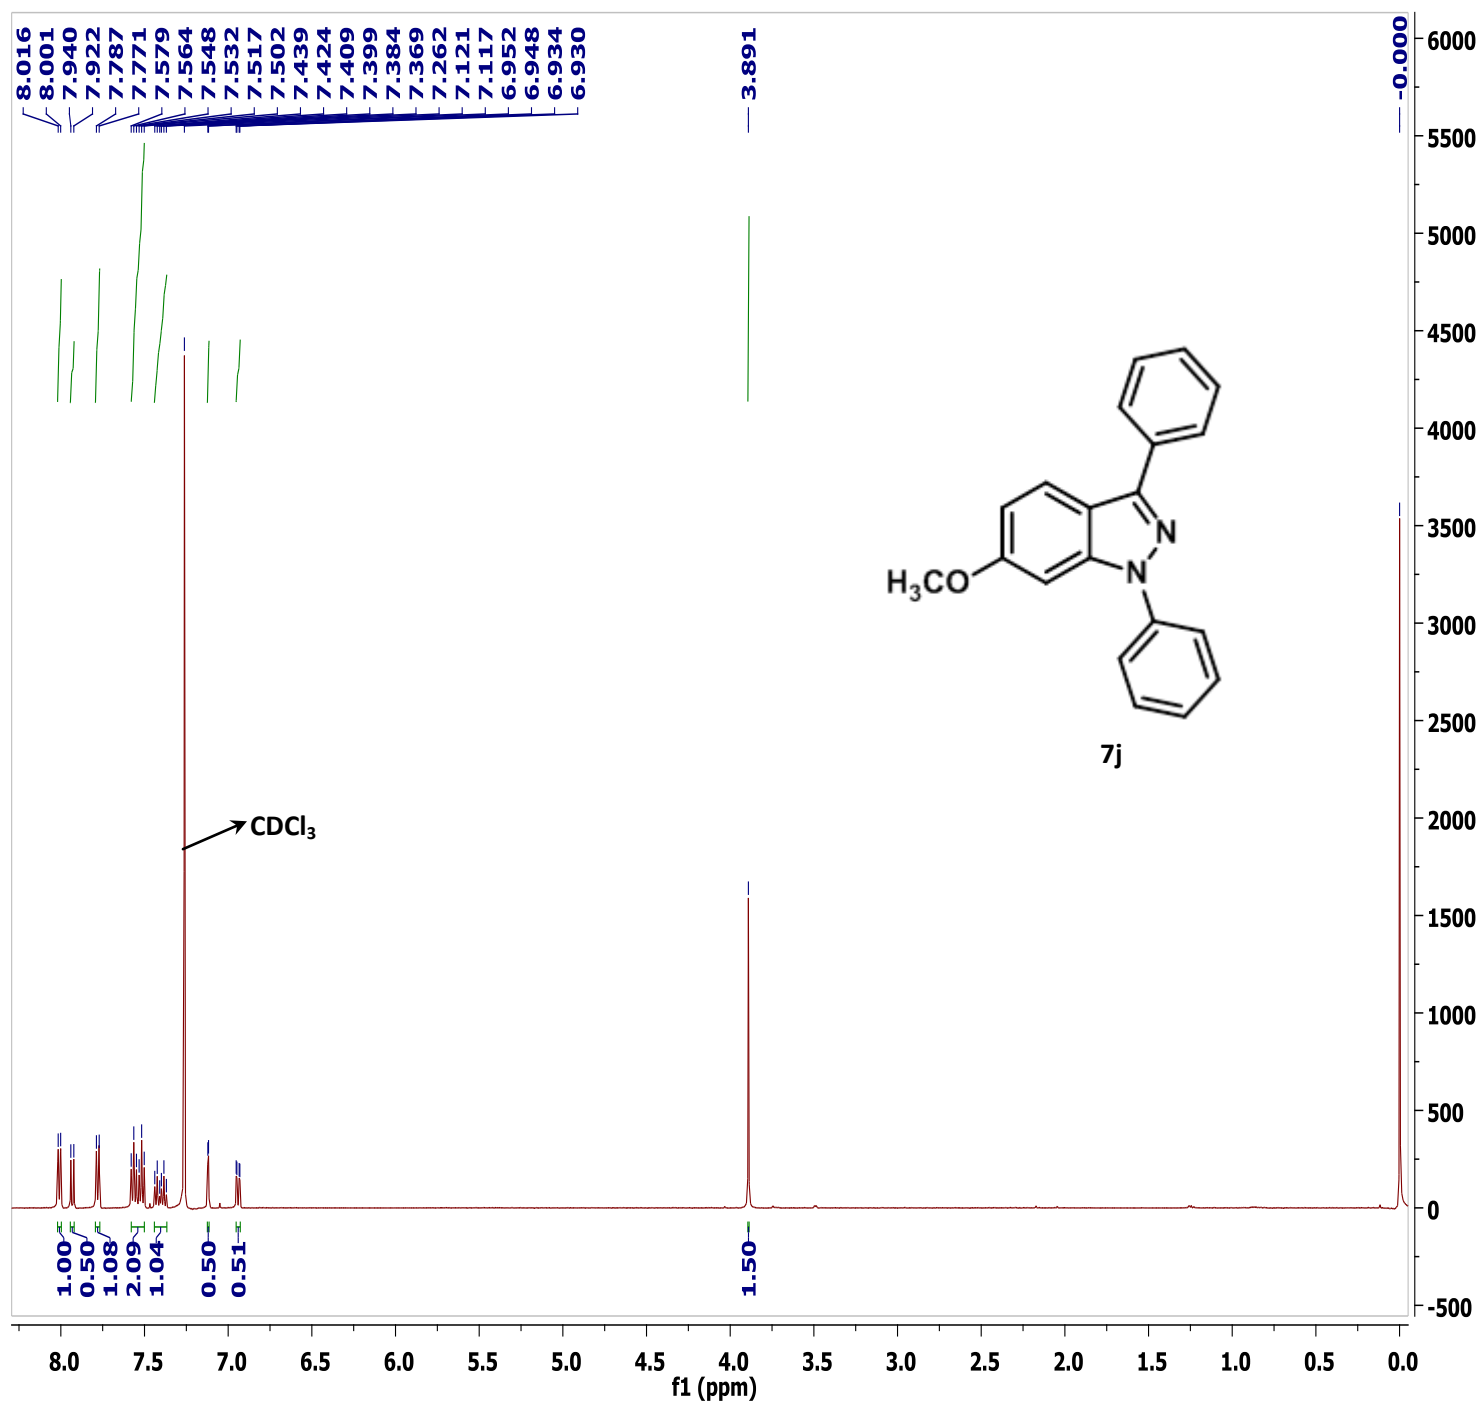

**Figure S46** <sup>1</sup>H NMR of compound **7j** in CDCl<sub>3</sub>

**Compound 3** Yellow solid; mp: >280 °C; (0.18 g in 60% yield). <sup>1</sup>H NMR (500 MHz, CDCl<sub>3</sub>) δ = 8.98 (s, 2H), 8.95 (s, 2H), 8.32 (s, 2H), 8.17 (d, *J* = 8.5 Hz, 2H), 7.99 (d, *J* = 8.5 Hz, 2H), 7.74-7.71 (m, 2H), 7.61-7.58 (m, 2H), 7.53-7.50 (m, 2H) ppm.

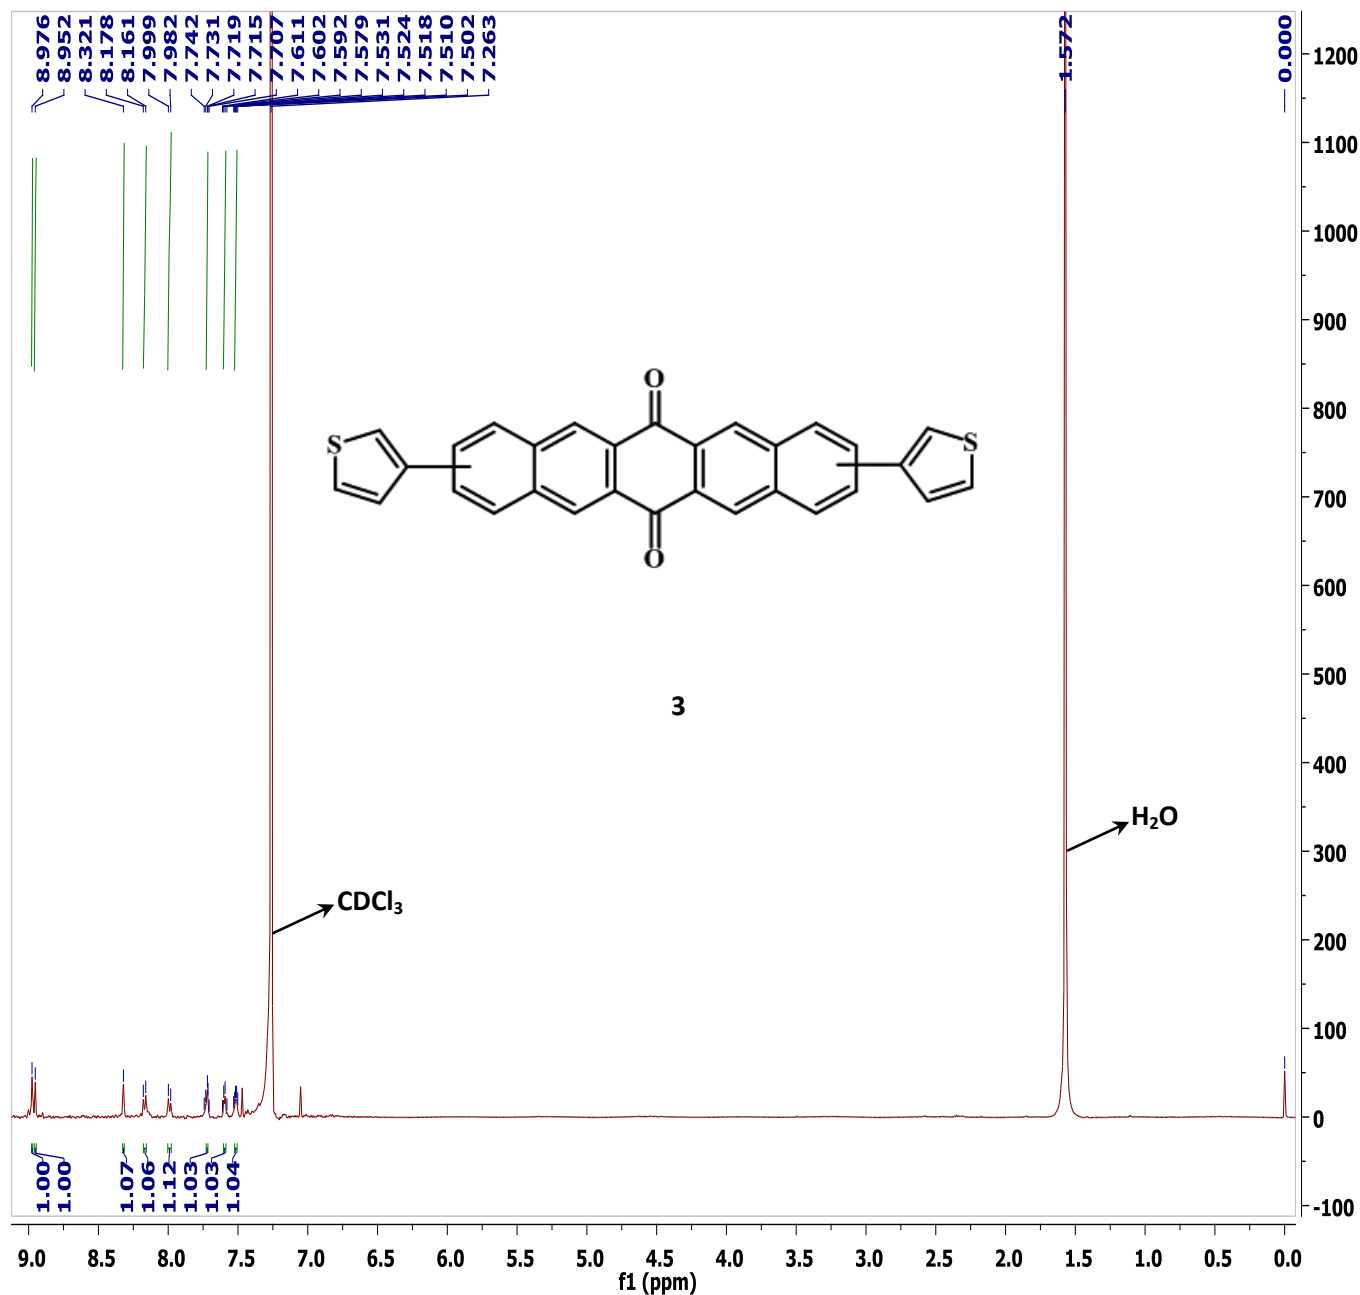

**Figure S47** <sup>1</sup>H NMR of compound 3 in CDCl<sub>3</sub>

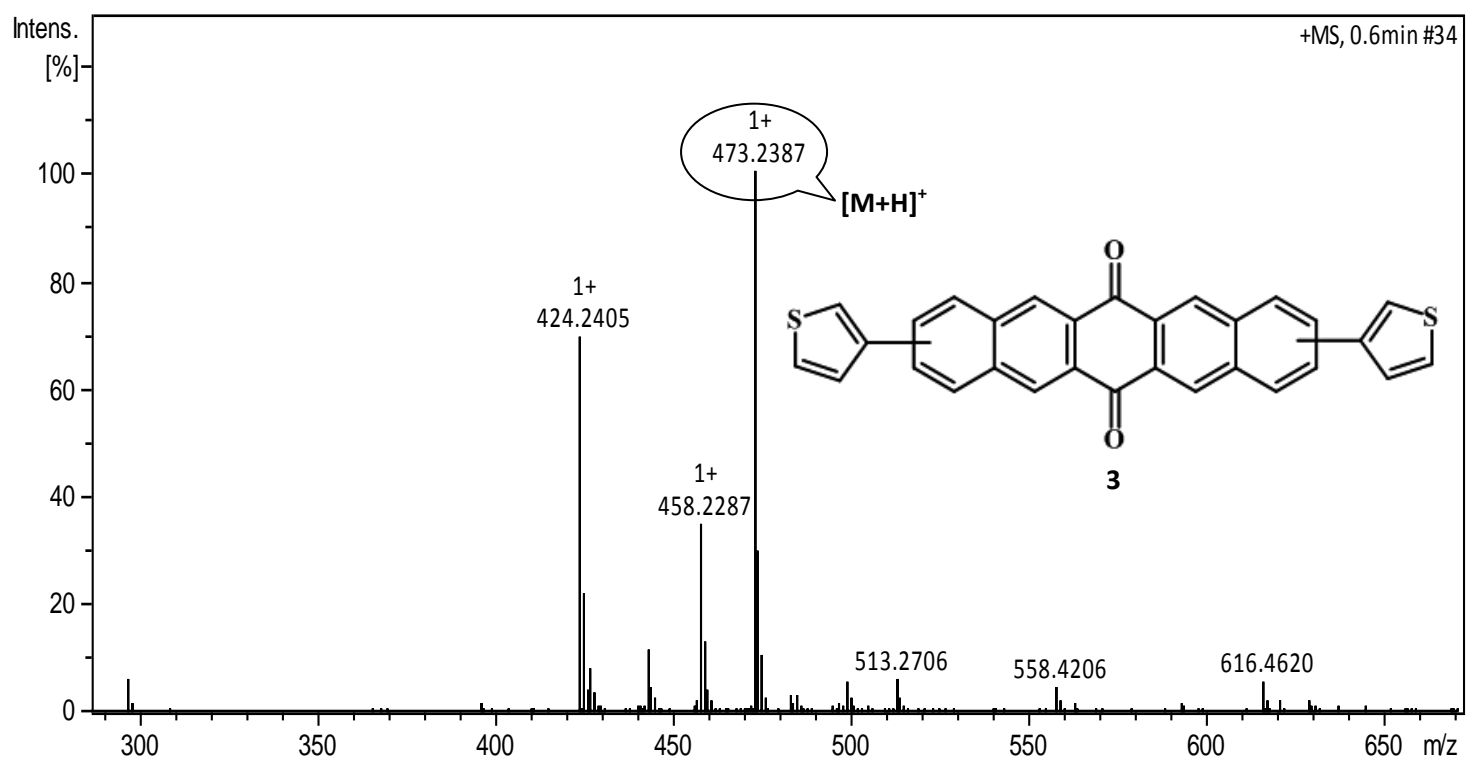

**Figure S48** Mass spectra of compound **3**.

**Compound 5** Yellow solid; mp: >280 °C; (0.19 g in 63% yield).  $^1\text{H}$  NMR (500 MHz,  $\text{CDCl}_3$ )  $\delta$  = 8.96 (s, 2H), 8.95 (s, 1H), 8.93 (s, 1H), 8.32 (s, 1H), 8.15-8.13 (m, 3H), 7.99-7.97 (m, 1H), 7.73-7.71 (m, 2H), 7.57-7.56 (m, 1H), 7.44-7.43 (m, 1H), 7.20-7.18 (m, 1H) ppm.

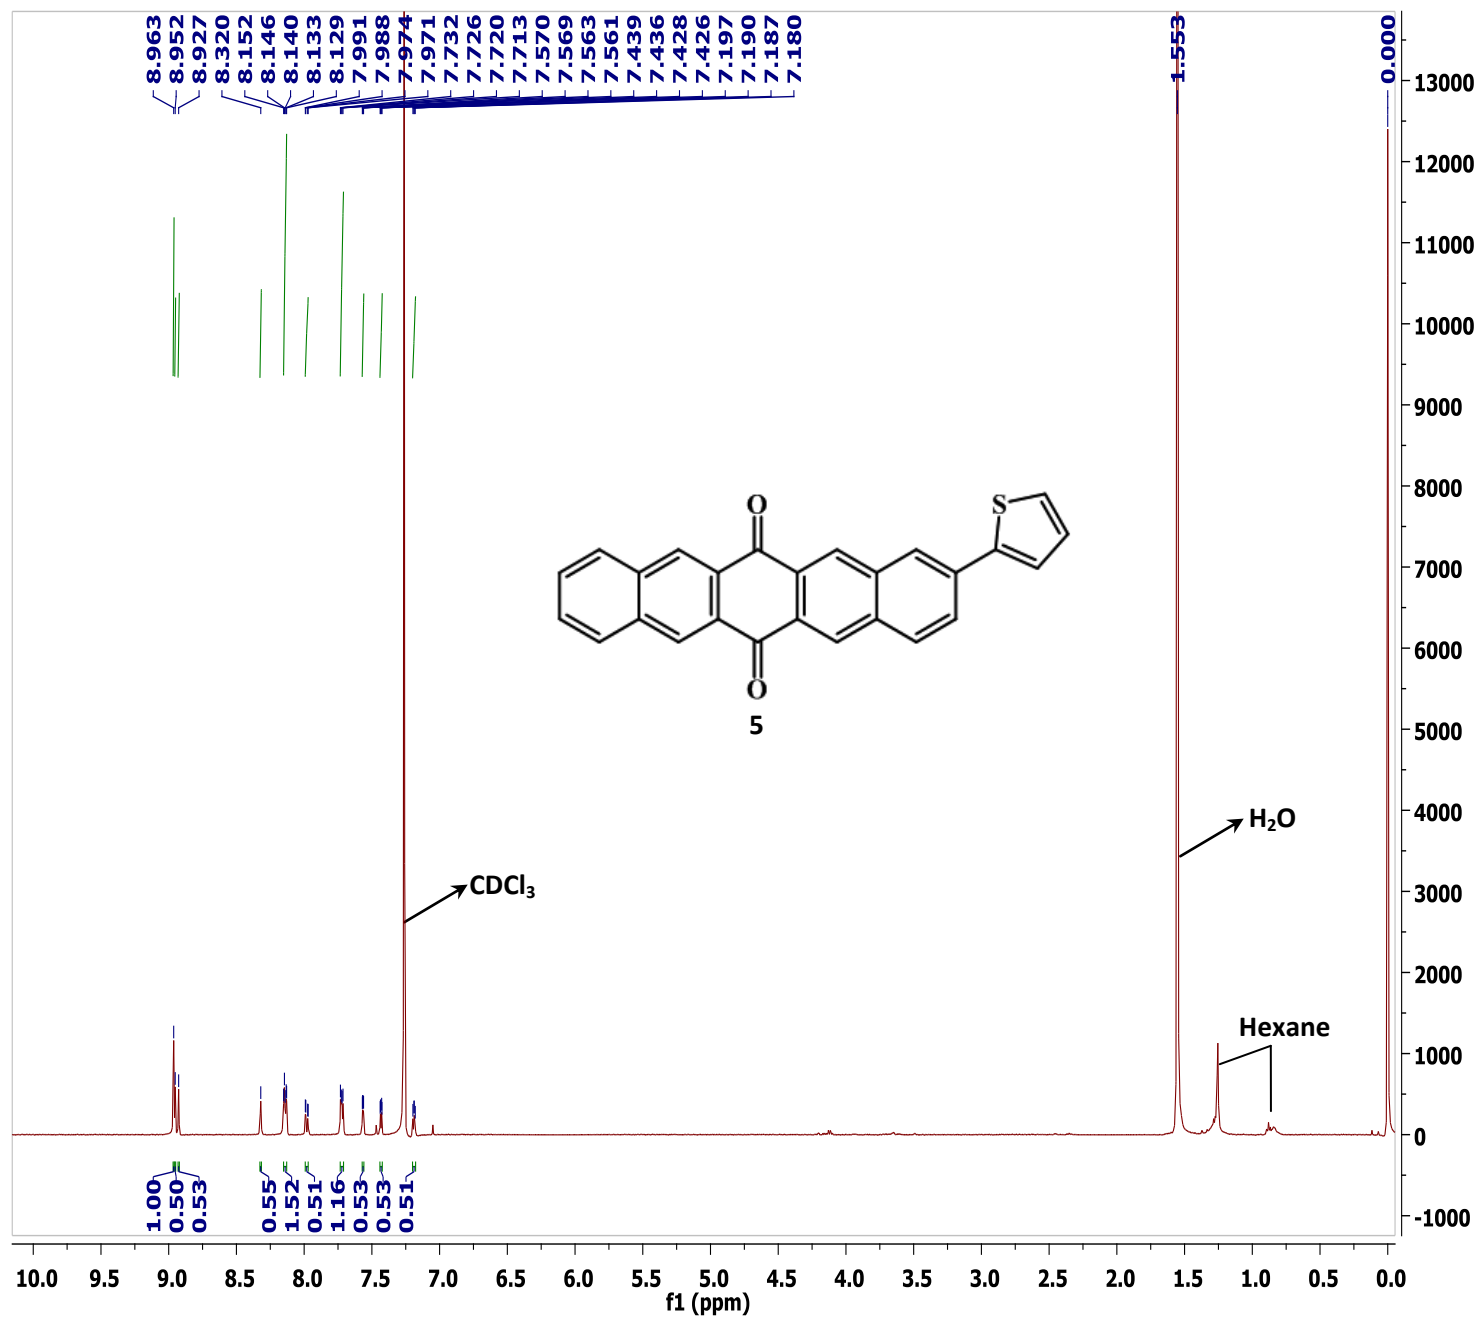

**Figure S49**  $^1\text{H}$  NMR of compound **5** in  $\text{CDCl}_3$

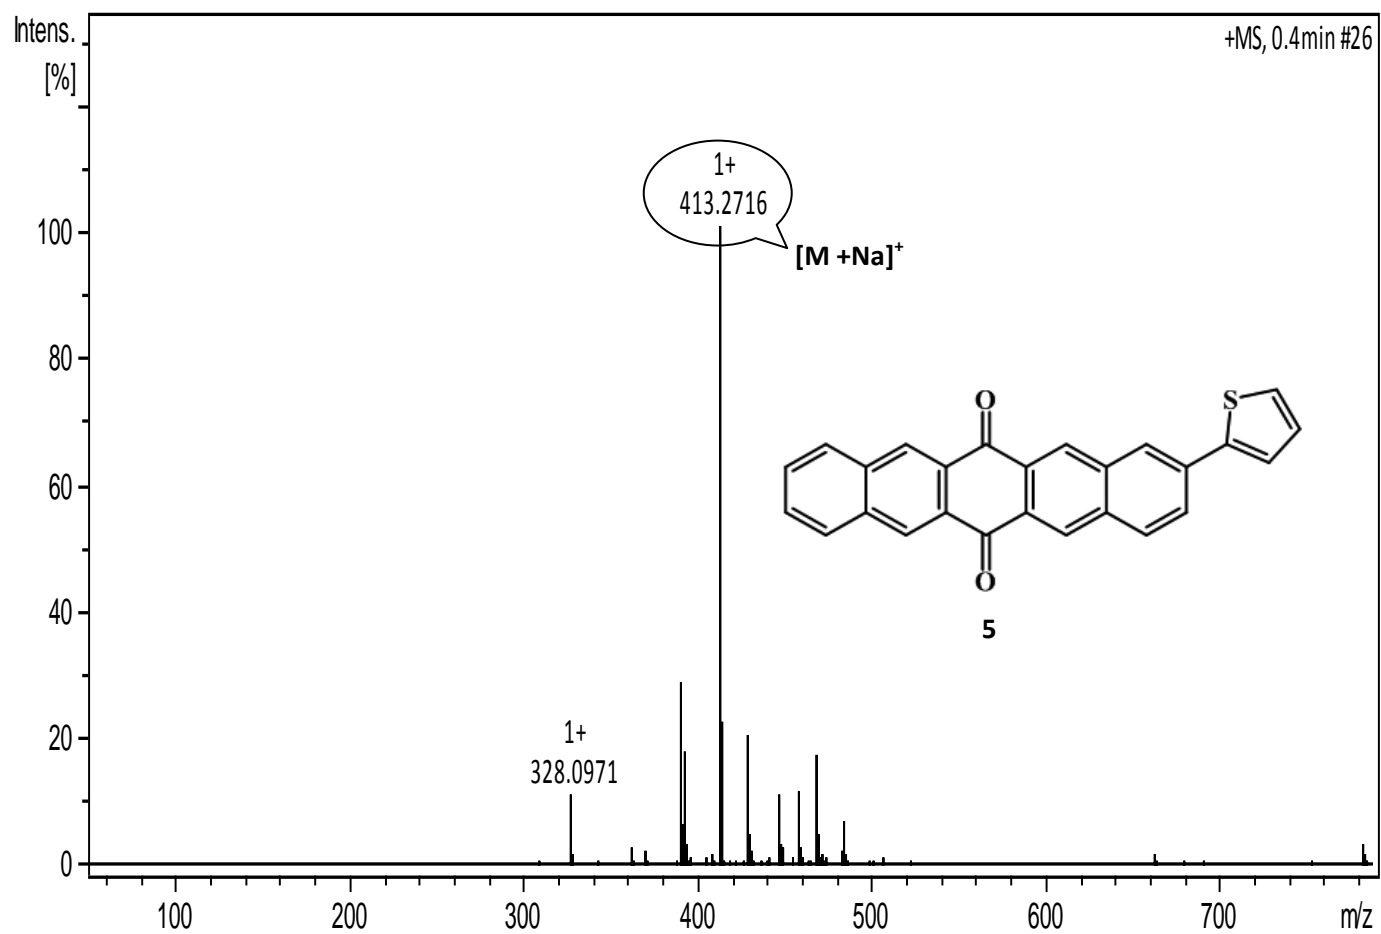

**Figure S50** Mass spectrum of compound **5**.



- (1) Chopra, R.; Sharma, K.; Bhalla, V.; Kumar, M. Pentacenequinone-stabilized silver nanoparticles: A reusable catalyst for the Diels-Alder [4 + 2] cycloaddition Reactions. *J. Org. Chem.* **2016**, *81*, 1039-1046.
- (2) Zhang, T.; Bao, W. Synthesis of 1*H*-Indazoles and 1*H*-Pyrazoles via FeBr<sub>3</sub>/O<sub>2</sub> mediated intramolecular C-H amination. *J. Org. Chem.* **2013**, *78*, 1317-1322.
- (3) Song, Y.; Tran, V. T.; Lee, J. Tuning plasmon resonance in magnetoplasmonic nanochains by controlling polarization and interparticle distance for simple preparation of optical filters. *ACS Appl. Mater. Interfaces* **2017**, *9*, 24433-24439.
- (4) Fang, W.; Zhang, H.; Wang, X.; Wei, W.; Shen, Y.; Yu, J.; Liang, J.; Zheng, J.; Shen, Y. Facile synthesis of tunable plasmonic silver core/magnetic Fe<sub>3</sub>O<sub>4</sub> shell nanoparticles for rapid capture and effective photothermal ablation of bacterial pathogens. *New J. Chem.* **2017**, *41*, 10155-10164.
- (5) Das, R.; Rinaldi-Montes, N.; Alonso, J.; Amghouz, Z.; Garaio, E.; García, J. A.; Gorria, P.; Blanco, J. A.; Phan, M. H.; Srikanth, H. Boosted hyperthermia therapy by combined AC magnetic and photothermal exposures in Ag/Fe<sub>3</sub>O<sub>4</sub> nanoflowers. *ACS Appl. Mater. Interfaces* **2016**, *8*, 25162-25169.
- (6) Blocho, M. L.; Paclawski, K.; Wojnicki, M.; Fitzner, K. The kinetics of redox reaction of gold(III) chloride complex ions with L-ascorbic acid. *Inorganica Chimica Acta* **2013**, *395*, 189-196.
- (7) Sau, T. K.; Murphy, C. J. Seeded high yield synthesis of short Au nanorods in aqueous solution. *Langmuir* **2004**, *20*, 6414-6420.
- (8) Goswami, S.; Das, S.; Aich, K.; Sarkar, D.; Mondal, T. K.; Quah, C. K.; Fun, H. K. CHEF induced highly selective and sensitive turn-on fluorogenic and colorimetric sensor for Fe<sup>3+</sup>. *Dalton Trans.* **2013**, *42*, 15113-15119.
- (9) Spiteri, C.; Keeling, S.; Moses, J. E. New synthesis of 1-Substituted-1*H*-indazoles via 1,3-Dipolar Cycloaddition of *in situ* generated nitrile imines and benzyne. *Org. Lett.* **2010**, *12*, 3368-3371.
- (10) Hattori, K.; Yamaguchi, K.; Yamaguchi, J.; Itami, K. Pd- and Cu-catalyzed C-H arylation of indazoles. *Tetrahedron* **2012**, *68*, 7605-7612.
- (11) Kashiwa, M.; Sonoda M.; Tanimori, S. Facile access to 1*H*-Indazoles through iodobenzene-catalyzed C-H amination under Mild, transition-metal-free conditions. *Eur. J. Org. Chem.* **2014**, *22*, 4720-4723.
- (12) Yu, J.; Lim, J. W.; Kim, S. Y.; Kim, J.; Kim, J. N. An efficient transition- metal free synthesis of 1*H*-indazoles from arylhydrazones with montmorillonite K-10 under O<sub>2</sub> atmosphere *Tetrahedron Letters* **2015**, *56*, 1432-1436.
